# Supplementary material
Source: Research Square preprint supplement (doi:10.21203/rs.3.rs-9116792/v1)
Supplement: Supplementary file 1 [file 49e88e7058dffbbf5c01910c.docx]

**Supplementary Fig. 1** Scatter plot of BMI and galectin-3 levels. Each point = 1 SNP. Horizontal axis: SNP effect on BMI; vertical axis: SNP effect on galectin-3. Methods: IVW, weighted median, MR Egger, simple mode, weighted mode

**Supplementary Fig. 2** Leave-one-out analysis of BMI and periodontitis. Shown are Mendelian randomization estimates (beta) after excluding each individual SNP. No outlier SNP was detected, indicating a robust causal association between BMI and periodontitis
