# Supplementary material
Source: Research Square preprint supplement (doi:10.21203/rs.3.rs-9116792/v1)
Supplement: Supplementary file 2 [file 748062bc93fe0da5a9704129.xlsx]

## Sheet: Table2
	Table 2 Sensitivity analysis of MR estimates
	Test	Value	P Value	Conclusion
	Heterogeneity (Cochran's Q)	5.046	0.654	No Heterogeneity
	Pleiotropy (Egger Intercept)	0.0037	0.36	No Pleiotropy
	Abbreviations: Q, Cochran's Q statistic; Egger Intercept, MR-Egger intercept test. No significant heterogeneity or horizontal pleiotropy was identified
