# Supplementary material
Source: Research Square preprint supplement (doi:10.21203/rs.3.rs-9116792/v1)
Supplement: Supplementary file 3 [file 80fc1a7ccaae40ed6a875a0d.xlsx]

## Sheet: Supp Table 2
	Supplementary Table 2 Characteristics of instrumental SNPs										Abbreviations: This table details the single nucleotide polymorphisms (SNPs) selected after quality control. Columns include SNP ID, effect allele, other allele, beta coefficient, standard error (SE), P-value, and F-statistic. All F-statistics were > 10, indicating no weak instrument bias. BMI, body mass index; T2DM, type 2 diabetes mellitus; SNP, single nucleotide polymorphism
	SNP	exposure	effect allele	other allele	eaf	beta	se	pval	F statistic
	rs10063055	BMI	T	C	0.253365	0.0136775	0.00226991	1.70000422215636E-09I3I3:I1639	36.3075
	rs10077431	BMI	A	C	0.21786	-0.00323581	0.0024045	0.18	1.81099
	rs10087241	BMI	A	G	0.593614	-0.0133834	0.00201746	3.29989e-11	44.0071
	rs10100265	BMI	C	A	0.613716	-0.0179918	0.00203402	9.09913e-19	78.2418
	rs10114341	BMI	C	T	0.44029	-0.00734728	0.00199472	0.000230001	13.5672
	rs10160769	BMI	C	G	0.21751	-0.0155862	0.00242199	1.2e-10	41.4129
	rs10172483	BMI	T	A	0.234856	0.0127394	0.00232602	4.30002e-08	29.9965
	rs10182416	BMI	G	A	0.512223	0.0130378	0.00197134	3.69999e-11	43.7407
	rs10184537	BMI	T	C	0.339341	-0.016303	0.00208355	5.10035e-15	61.2248
	rs10401969	BMI	C	T	0.076171	-0.00233809	0.0037415	0.53	0.390509
	rs10402950	BMI	C	T	0.289347	0.0135545	0.00218692	5.69994e-10	38.415
	rs10423928	BMI	A	T	0.194358	-0.0340136	0.00249869	3.40017e-42	185.302
	rs1050226	BMI	G	A	0.408461	-0.000666763	0.00200836	0.74	0.11022
	rs10505836	BMI	C	A	0.860012	0.0184851	0.00287086	1.2e-10	41.4591
	rs10510025	BMI	T	C	0.247013	0.0175643	0.00229886	2.19989e-14	58.3763
	rs1061813	BMI	A	G	0.535045	-0.00102802	0.00198284	0.6	0.268799
	rs1063355	BMI	G	T	0.609122	0.00538721	0.00202631	0.00779992	7.06832
	rs1064213	BMI	A	G	0.478377	0.0149301	0.00197196	3.69999e-14	57.323
	rs10740322	BMI	A	G	0.6872	-0.00233668	0.00214062	0.28	1.19157
	rs10742752	BMI	C	T	0.612239	0.0117979	0.00202961	6.1e-09	33.7897
	rs10760277	BMI	T	C	0.385049	0.0138734	0.00203825	1e-11	46.3288
	rs10771041	BMI	T	C	0.116102	0.0213233	0.0030884	5.00035e-12	47.6696
	rs10780248	BMI	A	G	0.559454	-0.0121232	0.00199415	1.2e-09	36.9589
	rs1078141	BMI	T	C	0.383867	0.0142239	0.00205862	4.90004e-12	47.7403
	rs10799778	BMI	G	T	0.833718	-0.0182237	0.00264876	6.00067e-12	47.3356
	rs10811661	BMI	C	T	0.173071	0.00685844	0.00261326	0.00870001	6.88788
	rs10824211	BMI	T	C	0.139491	0.0207688	0.00286631	4.30031e-13	52.5021
	rs10830963	BMI	G	C	0.275014	0.0078615	0.00221116	0.000379997	12.6407
	rs10832778	BMI	G	C	0.623038	0.0115628	0.00203985	1.40001e-08	32.1314
	rs10842994	BMI	T	C	0.195943	0.000819922	0.00248509	0.74	0.108858
	rs10887578	BMI	C	G	0.497499	0.0133212	0.00198909	2.09991e-11	44.8516
	rs10927006	BMI	C	T	0.143704	-0.0168156	0.00281467	2.30001e-09	35.6919
	rs10960293	BMI	T	G	0.333719	-0.0140984	0.00210242	1.99986e-11	44.9677
	rs10974438	BMI	C	A	0.351309	-0.00234359	0.00207307	0.26	1.27801
	rs10989067	BMI	A	G	0.31593	0.0169514	0.00212349	1.39991e-15	63.7251
	rs11001963	BMI	T	C	0.581338	0.0116794	0.00201921	7.29995e-09	33.4563
	rs11009685	BMI	T	C	0.244096	-0.0130834	0.00230766	1.40001e-08	32.1438
	rs11012732	BMI	G	A	0.331683	0.0216425	0.00210126	7.10068e-25	106.085
	rs11057072	BMI	G	A	0.233706	0.0128422	0.00233829	4e-08	30.1635
	rs11079849	BMI	T	C	0.328531	-0.020093	0.00211163	1.80011e-21	90.5428
	rs11098676	BMI	C	T	0.789609	-0.00717247	0.00242139	0.00309999	8.77421
	rs11099020	BMI	T	C	0.640609	-0.0142038	0.00206202	5.60015e-12	47.4486
	rs11107116	BMI	T	G	0.2205	-0.00275657	0.00238361	0.25	1.33742
	rs11115160	BMI	A	G	0.237797	-0.0130768	0.00233641	2.19999e-08	31.326
	rs11122450	BMI	G	T	0.611739	-0.0116316	0.00202425	9.09997e-09	33.018
	rs11134679	BMI	G	A	0.684753	0.0182459	0.00213286	1.20005e-17	73.1823
	rs11150745	BMI	G	A	0.317711	-0.0211611	0.00212961	2.90001e-23	98.7362
	rs111598585	BMI	T	C	0.208671	-0.0142245	0.00243798	5.39995e-09	34.0419
	rs11161044	BMI	C	G	0.807458	0.0169247	0.00251308	1.59993e-11	45.3554
	rs11165643	BMI	T	C	0.590103	0.0193319	0.00200337	4.90004e-22	93.1165
	rs111689389	BMI	C	G	0.282614	-0.0136706	0.00219522	4.70002e-10	38.781
	rs11218510	BMI	A	G	0.40047	-0.0144616	0.00202121	8.4004e-13	51.1929
	rs11250094	BMI	C	G	0.548052	-0.0202907	0.00199209	2.29985e-24	103.747
	rs11257655	BMI	T	C	0.208212	0.000302821	0.0024342	0.9	0.015476
	rs1126930	BMI	C	G	0.035271	0.0322695	0.00535892	1.7e-09	36.2602
	rs1127655	BMI	T	C	0.529715	0.000586283	0.00197573	0.77	0.0880561
	rs113079574	BMI	T	C	0.19279	-0.0155896	0.00251598	5.80003e-10	38.3933
	rs113166493	BMI	T	C	0.09684	-0.00339157	0.00339926	0.32	0.995481
	rs113603865	BMI	T	C	0.21205	0.0186013	0.00242689	1.80011e-14	58.7471
	rs113624107	BMI	A	G	0.22586	0.0150461	0.00236876	2.1e-10	40.3465
	rs11525873	BMI	C	T	0.097701	-0.0239781	0.00333603	6.59933e-13	51.6618
	rs11607476	BMI	C	A	0.486574	0.015712	0.00199179	3.10027e-15	62.2266
	rs11608710	BMI	G	T	0.062119	0.0248489	0.00415281	2.19999e-09	35.8039
	rs11610621	BMI	A	T	0.148174	0.0164869	0.00278318	3.09999e-09	35.091
	rs11630647	BMI	A	G	0.251739	-0.012674	0.00228082	2.69998e-08	30.8777
	rs11634851	BMI	G	C	0.465442	0.0118671	0.00198456	2.19999e-09	35.757
	rs116374395	BMI	A	G	0.035444	0.0318817	0.00536236	2.80001e-09	35.3485
	rs11642090	BMI	C	T	0.373536	0.0114184	0.00205925	2.90001e-08	30.7463
	rs11656076	BMI	A	G	0.224774	-0.0154285	0.00237054	7.59976e-11	42.3597
	rs1167311	BMI	A	G	0.681309	-0.0192649	0.00213109	1.59993e-19	81.7203
	rs11691869	BMI	A	C	0.362038	-0.0193158	0.00205562	5.60015e-21	88.2957
	rs11699828	BMI	A	G	0.035832	-0.0335418	0.00582677	8.60003e-09	33.1373
	rs11708067	BMI	G	A	0.242362	0.00740984	0.00230142	0.00129999	10.3664
	rs11709402	BMI	G	A	0.278732	0.0228192	0.00220796	4.90004e-25	106.812
	rs117118217	BMI	C	G	0.017711	0.0448186	0.00788004	1.29999e-08	32.3489
	rs11757278	BMI	C	T	0.303879	-0.0146269	0.00214834	9.8992e-12	46.3552
	rs11778219	BMI	G	A	0.163123	0.015796	0.0026874	4.20001e-09	34.5485
	rs118136827	BMI	T	G	0.281086	-0.0132582	0.0022019	1.7e-09	36.2555
	rs1191600	BMI	A	C	0.593587	-0.0122197	0.00202687	1.7e-09	36.3471
	rs11919665	BMI	T	A	0.679775	-0.0127854	0.00211292	1.40001e-09	36.6153
	rs11925227	BMI	A	G	0.187342	0.0129495	0.00255085	3.79997e-07	25.7713
	rs11926707	BMI	C	T	0.620285	-0.00293926	0.00204473	0.15	2.06635
	rs12072739	BMI	G	A	0.224478	0.0157008	0.00236691	3.29989e-11	44.0028
	rs12088739	BMI	G	A	0.090784	0.00252639	0.00343013	0.46	0.542475
	rs12089815	BMI	A	G	0.54861	-0.0123121	0.00198606	5.69994e-10	38.4308
	rs12101393	BMI	G	C	0.21723	-0.0160905	0.00241172	2.49977e-11	44.5128
	rs12140153	BMI	T	G	0.094252	-0.033075	0.0034589	1.20005e-21	91.4374
	rs12149660	BMI	A	G	0.114956	-0.0227338	0.00311586	2.99985e-13	53.2339
	rs12259464	BMI	A	G	0.48447	0.0130895	0.00198686	4.49987e-11	43.4022
	rs12273545	BMI	T	C	0.056505	0.0248393	0.00428551	6.80002e-09	33.5949
	rs12299509	BMI	G	A	0.469315	-0.00218096	0.00197979	0.27	1.21355
	rs1229984	BMI	C	T	0.972775	0.037357	0.00599385	4.60002e-10	38.8447
	rs12340969	BMI	T	C	0.441399	-0.0208868	0.0019941	1.10002e-25	109.711
	rs12364470	BMI	G	T	0.164556	0.0192705	0.0026658	4.90004e-13	52.2554
	rs12440603	BMI	T	C	0.433693	0.0139285	0.0020011	3.40017e-12	48.4475
	rs12462975	BMI	A	G	0.329692	0.0195822	0.00212071	2.60016e-20	85.263
	rs12507026	BMI	T	A	0.43475	0.0289896	0.0019931	6.29941e-48	211.556
	rs12541408	BMI	C	T	0.31742	-0.0143261	0.00212723	1.59993e-11	45.3552
	rs12617659	BMI	T	C	0.148146	0.00112848	0.00277843	0.68	0.164964
	rs1263629	BMI	G	A	0.143824	0.0176064	0.00282352	4.49997e-10	38.883
	rs1266874	BMI	G	A	0.349619	0.0140966	0.0020712	1e-11	46.3217
	rs12681792	BMI	A	C	0.1926	0.0148693	0.00251693	3.50002e-09	34.9011
	rs12692596	BMI	T	C	0.37185	0.0130872	0.00203738	1.29999e-10	41.2619
	rs12696039	BMI	G	A	0.149405	-0.0152802	0.0027705	3.50002e-08	30.4188
	rs12712767	BMI	A	G	0.370925	0.0114221	0.00204487	2.30001e-08	31.2004
	rs1286058	BMI	A	T	0.703747	0.0149126	0.00216922	6.20012e-12	47.2606
	rs12881629	BMI	G	A	0.08265	0.0220748	0.00358929	7.69999e-10	37.8248
	rs12910825	BMI	G	A	0.360146	0.00247098	0.00206231	0.23	1.43559
	rs12921986	BMI	G	A	0.077984	0.0203327	0.0036983	3.79997e-08	30.2264
	rs12937411	BMI	T	C	0.408167	-0.017187	0.00201383	1.39991e-17	72.8374
	rs12945601	BMI	C	T	0.61654	0.00660052	0.00204448	0.0012	10.4229
	rs1296328	BMI	C	A	0.559032	-0.018862	0.001999	3.90032e-21	89.0328
	rs12970134	BMI	A	G	0.265687	0.0489599	0.00224019	6.9024e-106	477.652
	rs12974458	BMI	T	C	0.543175	0.0152466	0.00199717	2.29985e-14	58.2795
	rs13012070	BMI	A	G	0.228388	-0.0136501	0.00234795	6.1e-09	33.7982
	rs13033310	BMI	A	G	0.25276	0.012611	0.0022826	3.29997e-08	30.5239
	rs13097918	BMI	A	T	0.212315	0.0145561	0.0024161	1.7e-09	36.2961
	rs13107325	BMI	T	C	0.07492	0.0475799	0.00375479	8.49963e-37	160.574
	rs13176429	BMI	C	T	0.687609	0.0141555	0.00213122	3.10027e-11	44.1158
	rs1320251	BMI	T	C	0.454791	-0.0180321	0.00199407	1.50003e-19	81.7734
	rs13218383	BMI	G	C	0.335132	-0.0144025	0.00209236	5.79963e-12	47.3809
	rs1322842	BMI	G	A	0.609274	-0.0131292	0.00203539	1.09999e-10	41.6084
	rs13234269	BMI	A	T	0.493357	0.00810844	0.00198406	4.39997e-05	16.7019
	rs13239186	BMI	T	C	0.302643	0.00320249	0.00216575	0.14	2.18655
	rs13248187	BMI	C	T	0.268557	0.015764	0.00224155	1.99986e-12	49.4579
	rs1327259	BMI	G	A	0.387722	-0.0148532	0.00203363	2.80027e-13	53.3453
	rs13291723	BMI	A	G	0.570683	0.0110318	0.00199876	3.40001e-08	30.4629
	rs1333039	BMI	C	G	0.600197	-0.00452974	0.00201823	0.025	5.03739
	rs13330951	BMI	G	A	0.484572	-0.0183667	0.00198219	1.9002e-20	85.8562
	rs13389219	BMI	T	C	0.392371	0.00964996	0.0020164	1.7e-06	22.9033
	rs13427822	BMI	G	A	0.271198	-0.0181515	0.00224142	5.60015e-16	65.5811
	rs1346841	BMI	A	G	0.405041	-0.013056	0.0020172	9.70063e-11	41.8912
	rs1359790	BMI	A	G	0.287204	-0.00242495	0.00218777	0.27	1.22858
	rs1360201	BMI	T	C	0.481546	0.0130075	0.00197747	4.79954e-11	43.2681
	rs140159717	BMI	T	C	0.082292	-0.0246882	0.00370967	2.80027e-11	44.2903
	rs1411432	BMI	C	A	0.186225	0.0214668	0.0025491	3.69999e-17	70.9187
	rs1438945	BMI	A	T	0.715119	-0.0133824	0.00219791	1.09999e-09	37.0722
	rs1441264	BMI	A	G	0.593681	0.0179033	0.00205854	3.40017e-18	75.6393
	rs1451963	BMI	T	G	0.082266	0.022201	0.00360585	7.39997e-10	37.9079
	rs1454687	BMI	G	C	0.515371	-0.0207916	0.00197396	6.09958e-26	110.943
	rs1458156	BMI	T	C	0.488431	0.014075	0.00197951	1.20005e-12	50.557
	rs145981104	BMI	G	A	0.063711	0.022711	0.00404552	2e-08	31.5155
	rs146569428	BMI	A	G	0.200749	0.0139533	0.00248571	2e-08	31.5103
	rs1471093	BMI	A	G	0.616663	0.0134619	0.00203996	4.10015e-11	43.5481
	rs1471740	BMI	C	T	0.7405	0.0193576	0.00225404	8.9002e-18	73.753
	rs147568678	BMI	C	T	0.23807	-0.0133327	0.00233034	1.09999e-08	32.7339
	rs1477290	BMI	C	T	0.136947	0.0337772	0.00289815	2.19989e-31	135.833
	rs147730268	BMI	T	G	0.087243	-0.0350799	0.00358357	1.29987e-22	95.8263
	rs1496653	BMI	G	A	0.203467	-0.00237243	0.00244898	0.33	0.938461
	rs1503526	BMI	C	T	0.480077	0.0154308	0.00197681	5.90065e-15	60.9322
	rs1552224	BMI	C	A	0.153936	0.00888585	0.00273405	0.0012	10.5629
	rs156201	BMI	C	G	0.753455	0.0131899	0.00228932	8.30004e-09	33.1948
	rs1582931	BMI	A	G	0.473242	-0.0133419	0.0019956	2.29985e-11	44.698
	rs1608113	BMI	T	A	0.364998	-0.0117766	0.00205086	9.29994e-09	32.9737
	rs1609010	BMI	G	A	0.565728	0.0209773	0.0019963	7.89951e-26	110.42
	rs16965658	BMI	G	A	0.060091	-0.0243736	0.00418404	5.69994e-09	33.935
	rs16988333	BMI	G	A	0.091963	0.00204294	0.00342988	0.55	0.354775
	rs17056301	BMI	C	T	0.256425	0.0135831	0.0022697	2.19999e-09	35.8147
	rs17086692	BMI	T	G	0.310366	-0.00386214	0.0021342	0.0700003	3.27481
	rs17132130	BMI	C	G	0.221467	-0.0178418	0.00238564	7.50067e-14	55.9329
	rs17149254	BMI	C	T	0.804854	-0.0213507	0.00255804	7.00003e-17	69.6642
	rs17168486	BMI	T	C	0.173309	0.00355803	0.00262324	0.17	1.83968
	rs17289010	BMI	G	A	0.32787	-0.0134661	0.00210438	1.6e-10	40.9482
	rs17334919	BMI	T	C	0.100171	0.00028086	0.00328283	0.93	0.00731953
	rs17399739	BMI	G	A	0.068893	0.0270713	0.00391006	4.40048e-12	47.9349
	rs17405722	BMI	A	G	0.074786	0.00348975	0.00377296	0.35	0.855508
	rs17411031	BMI	G	C	0.262358	-0.00718828	0.00224751	0.00140001	10.2293
	rs17446299	BMI	G	C	0.165544	0.0153235	0.00266515	8.9e-09	33.0577
	rs17544384	BMI	C	T	0.210864	0.0140931	0.00241434	5.30005e-09	34.0735
	rs1758632	BMI	G	C	0.623529	0.00942982	0.00203826	3.69999e-06	21.4036
	rs17631783	BMI	T	C	0.262903	-0.0120774	0.00225865	8.9e-08	28.5923
	rs17668356	BMI	G	C	0.146029	-0.0230543	0.00279318	1.50003e-16	68.1249
	rs17724992	BMI	G	A	0.26777	-0.017199	0.00224218	1.69981e-14	58.839
	rs17770336	BMI	T	C	0.322437	0.0242931	0.00211161	1.29987e-30	132.354
	rs1778830	BMI	A	G	0.362165	0.0140775	0.00205596	7.50067e-12	46.8837
	rs17791483	BMI	G	A	0.062191	-0.00991905	0.00409196	0.015	5.87594
	rs1788808	BMI	G	A	0.49478	-0.020404	0.00198255	7.70016e-25	105.921
	rs1793636	BMI	C	G	0.309144	-0.0133343	0.0021408	4.70002e-10	38.7961
	rs1801214	BMI	T	C	0.599948	0.0045453	0.00201665	0.0239999	5.08
	rs1805123	BMI	G	T	0.245301	-0.0167569	0.00229711	2.99985e-13	53.2137
	rs1834144	BMI	A	C	0.373192	-0.0140112	0.00205213	8.60003e-12	46.6166
	rs1860750	BMI	A	T	0.510958	0.0117038	0.00198192	3.50002e-09	34.8724
	rs1861410	BMI	T	C	0.555423	-0.0212558	0.00198918	1.20005e-26	114.184
	rs1884897	BMI	G	A	0.627378	0.020001	0.00205634	2.29985e-22	94.6049
	rs1899951	BMI	T	C	0.121977	0.0157008	0.00301133	1.79999e-07	27.1848
	rs1919243	BMI	C	T	0.487406	0.0116759	0.00200175	5.49997e-09	34.0221
	rs1928706	BMI	A	G	0.471082	-0.0119847	0.00198846	1.7e-09	36.3263
	rs1934102	BMI	A	G	0.347583	-0.0136682	0.00210374	8.19974e-11	42.2123
	rs1967772	BMI	A	G	0.285117	-0.0170434	0.00220377	1e-14	59.8108
	rs1990662	BMI	C	A	0.192721	0.0144775	0.00251798	8.9e-09	33.0585
	rs2035936	BMI	T	G	0.055892	0.0370863	0.00435778	1.69981e-17	72.4263
	rs2051559	BMI	C	T	0.13254	0.0204078	0.00291963	2.80027e-12	48.8581
	rs2075466	BMI	C	G	0.267182	0.0132903	0.00223627	2.80001e-09	35.32
	rs2102278	BMI	G	A	0.322486	0.0118583	0.0021139	2e-08	31.4685
	rs2133561	BMI	T	A	0.611084	-0.014097	0.00204744	5.79963e-12	47.4058
	rs213518	BMI	C	T	0.145608	0.0157894	0.00280491	1.79999e-08	31.6879
	rs2153740	BMI	G	A	0.479914	-0.0112551	0.00199313	1.6e-08	31.888
	rs215634	BMI	G	A	0.611879	-0.0155223	0.00203492	2.39994e-14	58.1859
	rs2172131	BMI	C	T	0.578723	-0.0149382	0.00200386	8.99912e-14	55.5727
	rs217672	BMI	C	A	0.271741	0.0170155	0.00223046	2.39994e-14	58.197
	rs2191348	BMI	T	G	0.549597	-0.000687466	0.00198772	0.73	0.119617
	rs2192158	BMI	G	A	0.553308	-0.015012	0.00198302	3.69999e-14	57.309
	rs2193101	BMI	G	C	0.812878	-0.0142847	0.00256649	2.59998e-08	30.9787
	rs2216931	BMI	A	C	0.661966	0.0169109	0.00208587	5.19996e-16	65.7293
	rs2234458	BMI	T	C	0.639519	-0.0203841	0.00205579	3.59998e-23	98.3163
	rs2237892	BMI	T	C	0.064076	0.0140041	0.00403403	0.000519996	12.0513
	rs2246618	BMI	T	C	0.306726	0.00711356	0.00213845	0.000879995	11.0656
	rs2249825	BMI	C	G	0.266743	-0.0146183	0.00223793	6.4998e-11	42.6678
	rs2253310	BMI	G	C	0.626099	0.0173213	0.00204115	2.09991e-17	72.013
	rs2261181	BMI	T	C	0.0975	0.00160498	0.00334068	0.630001	0.230818
	rs2271189	BMI	A	G	0.40272	-0.0163086	0.00201869	6.4998e-16	65.2671
	rs2275003	BMI	G	A	0.520932	-0.0119236	0.00197803	1.7e-09	36.337
	rs2289379	BMI	T	C	0.395648	-0.0152765	0.00202952	5.19996e-14	56.658
	rs2292662	BMI	T	C	0.150548	-0.00583328	0.00276278	0.0350002	4.45793
	rs2294120	BMI	G	A	0.455279	0.00159442	0.0019871	0.42	0.643822
	rs2296173	BMI	G	A	0.211038	0.0172687	0.00241463	8.60003e-13	51.1468
	rs2299383	BMI	T	C	0.425408	0.0183435	0.00200966	7.00003e-20	83.3142
	rs2307111	BMI	C	T	0.395025	-0.0280042	0.00202203	1.29987e-43	191.81
	rs2342892	BMI	G	T	0.516212	-0.0126972	0.00197715	1.29999e-10	41.2417
	rs2381404	BMI	C	T	0.243837	0.0139664	0.00229974	1.29999e-09	36.8817
	rs2396625	BMI	A	T	0.421331	-0.018919	0.00201335	5.60015e-21	88.2994
	rs2398861	BMI	G	A	0.259169	0.0179932	0.00226733	2.09991e-15	62.9778
	rs2425816	BMI	A	G	0.415111	0.0122284	0.00201106	1.2e-09	36.9734
	rs243019	BMI	C	T	0.456708	0.00258704	0.00198376	0.19	1.7007
	rs2433733	BMI	A	G	0.677659	-0.0171805	0.00210907	3.80014e-16	66.3574
	rs2439823	BMI	G	A	0.545612	0.0191998	0.00199108	5.30029e-22	92.9857
	rs2482356	BMI	C	T	0.429018	-0.0113511	0.00199506	1.29999e-08	32.3716
	rs2493394	BMI	G	A	0.108314	-0.0052595	0.00316884	0.0969996	2.75479
	rs2512892	BMI	C	T	0.566085	0.0129468	0.00199819	9.20026e-11	41.9809
	rs252761	BMI	T	G	0.587966	-0.0115046	0.00201769	1.2e-08	32.5113
	rs2568958	BMI	A	G	0.603656	0.0222928	0.00201204	1.59993e-28	122.76
	rs2569993	BMI	C	T	0.320327	0.01267	0.00212202	2.39999e-09	35.6496
	rs2606228	BMI	C	A	0.646368	-0.0138791	0.00208379	2.70023e-11	44.3624
	rs2616143	BMI	A	G	0.319862	-0.0138738	0.00212547	6.70039e-11	42.607
	rs2618039	BMI	T	A	0.381481	0.0143963	0.0020317	1.39991e-12	50.2091
	rs2678204	BMI	G	T	0.340162	0.024161	0.00208158	3.80014e-31	134.724
	rs2725371	BMI	G	A	0.696115	-0.0160301	0.00215845	1.10002e-13	55.1555
	rs2781668	BMI	T	C	0.165587	0.0148965	0.00265988	2.1e-08	31.3649
	rs2791643	BMI	T	C	0.761794	-0.0133837	0.00231332	7.19996e-09	33.4719
	rs2796441	BMI	A	G	0.418505	0.00734832	0.00200135	0.000239999	13.4812
	rs2820426	BMI	G	A	0.605142	-0.00724945	0.00202343	0.000340001	12.8361
	rs28350	BMI	G	A	0.820684	-0.0180335	0.00258234	2.90001e-12	48.7678
	rs28366156	BMI	C	T	0.130595	-0.0264826	0.00292978	1.59993e-19	81.7055
	rs2837996	BMI	C	T	0.651408	0.0126647	0.00207859	1.09999e-09	37.1238
	rs28404639	BMI	T	C	0.366041	-0.0117129	0.00205533	1.2e-08	32.4762
	rs28489620	BMI	A	G	0.290349	-0.0153737	0.00220025	2.80027e-12	48.8217
	rs2861685	BMI	C	T	0.411984	-0.0171274	0.00199763	1e-17	73.5111
	rs28670671	BMI	C	T	0.286024	-0.0124638	0.00226426	3.69999e-08	30.3004
	rs2867125	BMI	C	T	0.827375	0.0548233	0.00260384	2.09991e-98	443.304
	rs2870111	BMI	T	C	0.412066	-0.0157151	0.00201912	7.10068e-15	60.5773
	rs2875762	BMI	C	G	0.242953	0.015339	0.0023121	3.29989e-11	44.013
	rs2899644	BMI	T	C	0.229995	0.0149659	0.0023609	2.30001e-10	40.1838
	rs2908282	BMI	A	G	0.178577	-0.00315373	0.0025845	0.22	1.489
	rs2920503	BMI	T	C	0.285413	-0.0140307	0.00219666	1.7e-10	40.7974
	rs2925979	BMI	C	T	0.700039	-0.000376517	0.00215803	0.86	0.0304407
	rs2941452	BMI	G	A	0.617751	0.0111622	0.00203237	4e-08	30.1644
	rs2962334	BMI	T	G	0.020065	0.0432552	0.00703547	7.79992e-10	37.7999
	rs2972144	BMI	G	A	0.647585	-0.00191262	0.00206047	0.35	0.861638
	rs317656	BMI	A	T	0.724452	-0.0144763	0.00221303	6.09958e-11	42.7898
	rs3212038	BMI	G	A	0.328484	0.0149201	0.0021124	1.59993e-12	49.8874
	rs3213943	BMI	A	C	0.131525	-0.0179406	0.00288163	4.79999e-10	38.7612
	rs32421	BMI	T	A	0.224315	0.0132315	0.00237757	2.59998e-08	30.9707
	rs329118	BMI	T	C	0.419409	-0.0165734	0.0020038	1.29987e-16	68.4092
	rs329651	BMI	T	G	0.803977	0.0157218	0.00250202	3.29997e-10	39.4842
	rs34045288	BMI	T	C	0.334435	0.0234784	0.00209371	3.50026e-29	125.749
	rs340874	BMI	C	T	0.568004	0.00161265	0.0019862	0.42	0.659226
	rs34153025	BMI	C	T	0.022158	-0.0389151	0.00678155	9.59997e-09	32.929
	rs34234296	BMI	A	G	0.392437	-0.014947	0.00204032	2.39994e-13	53.6675
	rs34481751	BMI	A	C	0.165329	-0.0185029	0.00270404	7.8001e-12	46.8224
	rs34517439	BMI	A	C	0.121787	0.038848	0.00304983	3.59998e-37	162.251
	rs34696181	BMI	C	T	0.476084	0.0114345	0.00198283	8.10009e-09	33.2555
	rs347551	BMI	G	C	0.472268	0.013865	0.00201085	5.40008e-12	47.5423
	rs34811474	BMI	A	G	0.230756	-0.0285293	0.00234269	4.10015e-34	148.304
	rs348330	BMI	A	G	0.632211	-0.00105191	0.00205147	0.61	0.262922
	rs349071	BMI	A	G	0.500388	-0.0133062	0.00198231	1.9002e-11	45.0573
	rs35011184	BMI	A	G	0.22937	-0.0130494	0.00236409	3.40001e-08	30.4686
	rs35154326	BMI	G	A	0.274044	-0.0130427	0.00223442	5.30005e-09	34.0726
	rs35364449	BMI	T	C	0.109739	0.0217069	0.00318335	9.20026e-12	46.4972
	rs355777	BMI	C	G	0.407537	0.0152715	0.00201314	3.29989e-14	57.546
	rs35697587	BMI	A	G	0.508121	-0.0164677	0.00198067	9.20026e-17	69.126
	rs35697691	BMI	G	C	0.089346	0.0230305	0.00352223	6.20012e-11	42.7535
	rs35809007	BMI	A	G	0.363205	-0.0171009	0.00205627	9.09913e-17	69.1636
	rs35957544	BMI	T	G	0.574316	-0.0196429	0.00200438	1.10002e-22	96.0398
	rs36007635	BMI	A	G	0.137698	-0.021045	0.00286788	2.19989e-13	53.8488
	rs36061954	BMI	T	C	0.398747	0.0128445	0.00201928	2e-10	40.4614
	rs3735080	BMI	T	C	0.229838	-0.00519568	0.00234912	0.0269998	4.89186
	rs3756784	BMI	G	T	0.188905	0.0127039	0.00252873	5.1e-07	25.2388
	rs3764625	BMI	G	T	0.587594	-0.0117714	0.00201523	5.19996e-09	34.1198
	rs3766823	BMI	A	G	0.17196	0.016056	0.0026141	8.10009e-10	37.7251
	rs3784710	BMI	C	T	0.226602	-0.0297067	0.00236042	2.49977e-36	158.391
	rs3802177	BMI	A	G	0.309822	0.00478495	0.00214187	0.025	4.99078
	rs3803286	BMI	G	A	0.666815	-0.0186417	0.00209828	6.4003e-19	78.9304
	rs3807566	BMI	T	G	0.43832	-0.0120727	0.00199583	1.5e-09	36.5899
	rs3814883	BMI	T	C	0.482402	0.0240107	0.00198424	1e-33	146.427
	rs3851998	BMI	G	C	0.743064	-0.0136071	0.00226874	2e-09	35.9718
	rs3866805	BMI	A	C	0.355683	0.0117835	0.00206546	1.2e-08	32.5473
	rs3897102	BMI	T	C	0.411157	0.0120838	0.00202716	2.5e-09	35.5329
	rs3901286	BMI	A	C	0.15244	-0.0225553	0.00275602	2.70023e-16	66.978
	rs3902951	BMI	G	T	0.237151	0.0141019	0.00235267	2e-09	35.928
	rs3935190	BMI	A	G	0.536784	-0.0144864	0.00199701	4.00037e-13	52.6212
	rs394608	BMI	C	T	0.537697	0.0186353	0.00199484	9.49948e-21	87.2683
	rs396755	BMI	G	C	0.571164	-0.0123639	0.00199937	6.29999e-10	38.2406
	rs40071	BMI	C	T	0.179536	-0.0261666	0.00258163	3.80014e-24	102.732
	rs4017425	BMI	T	C	0.470208	-0.0125817	0.00198035	2.1e-10	40.3641
	rs4055791	BMI	T	C	0.416804	-0.0178082	0.00200801	7.39946e-19	78.6517
	rs406388	BMI	G	C	0.177266	0.015973	0.00260181	8.30004e-10	37.6896
	rs41279738	BMI	G	T	0.025988	0.0684263	0.0062225	4.00037e-28	120.925
	rs41315816	BMI	C	T	0.058989	0.0254409	0.00419129	1.29999e-09	36.8442
	rs4148155	BMI	G	A	0.113268	-0.0229681	0.00310659	1.39991e-13	54.6616
	rs4261944	BMI	G	T	0.364935	0.0138553	0.00205652	1.59993e-11	45.3906
	rs4284600	BMI	C	T	0.467122	0.0119673	0.00199506	2e-09	35.9816
	rs429343	BMI	G	A	0.576573	-0.0173795	0.00199729	3.29989e-18	75.7168
	rs429358	BMI	C	T	0.154166	-0.0266723	0.00274373	2.39994e-22	94.5014
	rs4307239	BMI	G	A	0.458941	0.0121413	0.00198816	1e-09	37.293
	rs4419475	BMI	T	A	0.407327	0.011487	0.0020106	1.09999e-08	32.6409
	rs4456769	BMI	T	C	0.333444	0.0146111	0.00210138	3.59998e-12	48.3456
	rs4477562	BMI	T	C	0.128644	0.0296118	0.00298011	2.90001e-23	98.7336
	rs4482463	BMI	A	C	0.923002	-0.0313175	0.00370692	2.99985e-17	71.3753
	rs45486197	BMI	A	G	0.065685	0.025766	0.00403737	1.7e-10	40.7284
	rs4562625	BMI	G	C	0.615007	-0.0130522	0.00202513	1.2e-10	41.5395
	rs459193	BMI	G	A	0.746645	0.00263081	0.00226627	0.25	1.34758
	rs4605363	BMI	C	A	0.341595	0.0163638	0.00207733	3.29989e-15	62.0522
	rs4625888	BMI	T	C	0.557644	0.0117507	0.00198303	3.09999e-09	35.1131
	rs4648450	BMI	A	C	0.466824	-0.014837	0.00198775	8.4004e-14	55.7146
	rs4658403	BMI	T	C	0.833659	-0.0188877	0.00264997	1e-12	50.8015
	rs4672338	BMI	T	C	0.336228	0.0135646	0.00208669	8.00018e-11	42.2569
	rs4686471	BMI	C	T	0.610098	-2.90182e-05	0.00203211	0.99	0.000203914
	rs4722398	BMI	T	C	0.136137	0.0186993	0.00287545	7.89951e-11	42.2901
	rs4737188	BMI	T	A	0.473864	-0.0124447	0.00198274	3.50002e-10	39.3947
	rs4764949	BMI	G	A	0.325892	-0.0183924	0.00211197	3.10027e-18	75.8405
	rs4790292	BMI	A	C	0.153693	-0.0254509	0.00275603	2.60016e-20	85.2783
	rs4810426	BMI	T	C	0.097844	-0.000516382	0.00335743	0.88	0.0236553
	rs4820410	BMI	G	A	0.345317	-0.0177457	0.00208527	1.69981e-17	72.4205
	rs4823182	BMI	G	A	0.333756	-0.000527266	0.00210468	0.8	0.0627606
	rs4832298	BMI	T	C	0.686142	-0.015965	0.00212268	5.40008e-14	56.5677
	rs4858940	BMI	C	T	0.885569	0.0229281	0.00309976	1.39991e-13	54.7117
	rs4865796	BMI	A	G	0.692731	-0.00947915	0.00214136	9.59997e-06	19.5956
	rs4876611	BMI	G	A	0.720243	0.0197549	0.00220502	3.29989e-19	80.2647
	rs4929923	BMI	C	T	0.645204	0.0189424	0.00206436	4.49987e-20	84.1975
	rs5011579	BMI	G	C	0.715152	0.0140268	0.00219322	1.6e-10	40.9028
	rs512121	BMI	C	T	0.192054	-0.0159359	0.00252176	2.59998e-10	39.9343
	rs516946	BMI	C	T	0.761746	0.00100693	0.00232031	0.66	0.188324
	rs5215	BMI	T	C	0.642475	0.0105765	0.00206259	2.90001e-07	26.2941
	rs529200	BMI	G	A	0.527829	0.0168965	0.0019785	1.29987e-17	72.9325
	rs539515	BMI	C	A	0.204942	0.0495291	0.0024426	1.99986e-91	411.165
	rs55707359	BMI	G	T	0.015432	0.0531292	0.00812381	6.20012e-11	42.7708
	rs55714539	BMI	C	A	0.343587	0.0175719	0.00210043	6.00067e-17	69.9876
	rs55726687	BMI	A	G	0.209709	0.02483	0.00242628	1.39991e-24	104.73
	rs55769038	BMI	A	G	0.590384	0.0160961	0.00201096	1.20005e-15	64.067
	rs557951	BMI	G	T	0.312937	0.0140534	0.00213387	4.49987e-11	43.3737
	rs558887	BMI	G	A	0.307507	-0.0129976	0.00214881	1.5e-09	36.5873
	rs559231	BMI	T	G	0.393053	0.0134907	0.00203562	3.40017e-11	43.9213
	rs56038322	BMI	A	G	0.31062	0.0139276	0.00214833	8.99912e-11	42.0291
	rs56133507	BMI	G	T	0.196875	0.0137622	0.00247385	2.69998e-08	30.9477
	rs56143236	BMI	T	C	0.256388	0.0126667	0.00226533	2.30001e-08	31.2654
	rs56161855	BMI	T	A	0.132847	0.0224575	0.00291784	1.39991e-14	59.2379
	rs56203622	BMI	C	T	0.145529	0.0179769	0.00280183	1.40001e-10	41.1667
	rs56352336	BMI	C	T	0.154894	-0.016327	0.00275021	2.90001e-09	35.2437
	rs56399737	BMI	T	C	0.449124	-0.0161325	0.00199646	6.4003e-16	65.2953
	rs56858768	BMI	A	G	0.296861	0.0159188	0.00217378	2.39994e-13	53.6277
	rs56893062	BMI	G	T	0.303342	0.0125141	0.00215383	6.19998e-09	33.758
	rs56930105	BMI	T	C	0.139295	0.0157557	0.00286187	3.69999e-08	30.3093
	rs57636386	BMI	C	T	0.08383	-0.0412553	0.00358326	1.10002e-30	132.557
	rs576674	BMI	A	G	0.831842	0.00267577	0.00264463	0.31	1.02369
	rs57989773	BMI	C	T	0.244995	0.0133488	0.00236315	1.6e-08	31.9082
	rs58862095	BMI	T	C	0.419266	-0.0229877	0.00200786	2.39994e-30	131.076
	rs59068084	BMI	T	G	0.410232	0.0110552	0.00201048	3.79997e-08	30.2367
	rs59086897	BMI	A	T	0.487541	0.033385	0.00196986	1.99986e-64	287.231
	rs59227842	BMI	G	A	0.31149	0.0229675	0.00215313	1.50003e-26	113.786
	rs59379014	BMI	T	C	0.073282	0.00293692	0.0037932	0.44	0.599477
	rs594024	BMI	C	T	0.554162	-0.0146771	0.00199081	1.69981e-13	54.3527
	rs6023655	BMI	G	A	0.765741	-0.0147346	0.00234997	3.59998e-10	39.3144
	rs6059662	BMI	G	A	0.657507	0.00820261	0.00209939	9.29994e-05	15.2657
	rs6066138	BMI	A	G	0.281754	0.00219459	0.00220472	0.32	0.990832
	rs60764613	BMI	T	G	0.144883	0.02099	0.00282688	1.10002e-13	55.1328
	rs61740466	BMI	A	G	0.237203	-0.0135153	0.00231885	5.60003e-09	33.9708
	rs61813324	BMI	T	C	0.135728	0.0290259	0.00292038	2.80027e-23	98.7854
	rs61828641	BMI	A	G	0.10925	0.0224585	0.00315913	1.20005e-12	50.539
	rs61871615	BMI	T	C	0.091551	-0.0267159	0.00359269	1e-13	55.2968
	rs61903695	BMI	G	A	0.254964	0.0166235	0.00227115	2.49977e-13	53.5739
	rs61953351	BMI	T	G	0.250291	0.000488637	0.00228341	0.83	0.0457936
	rs61992671	BMI	G	A	0.49195	-0.0161925	0.00206924	5.10035e-15	61.2359
	rs62007782	BMI	A	G	0.265091	-0.0167007	0.00224215	9.3994e-14	55.4805
	rs62020775	BMI	A	T	0.14168	-0.0165665	0.0028635	7.19996e-09	33.4709
	rs62072006	BMI	C	A	0.144541	0.0156492	0.00282374	2.99999e-08	30.7139
	rs62107261	BMI	C	T	0.048327	-0.0911559	0.00460882	4.60045e-87	391.192
	rs62176243	BMI	T	A	0.244987	-0.0149699	0.00228878	6.09958e-11	42.7789
	rs62190049	BMI	C	G	0.390446	-0.0111798	0.00203614	4e-08	30.1476
	rs622217	BMI	C	T	0.482906	0.00899968	0.00198122	5.60003e-06	20.6343
	rs62241847	BMI	G	A	0.314443	-0.0124263	0.00212897	5.30005e-09	34.0678
	rs62246311	BMI	A	G	0.102364	0.0207539	0.00325487	1.79999e-10	40.6567
	rs62379271	BMI	G	T	0.578511	0.0117237	0.00200557	5e-09	34.1707
	rs6265	BMI	T	C	0.188472	-0.0399185	0.00252719	3.29989e-56	249.501
	rs6430068	BMI	A	G	0.108559	0.0186066	0.0031882	5.30005e-09	34.0599
	rs6444950	BMI	A	G	0.237474	0.0158525	0.00232007	8.30042e-12	46.6867
	rs6474856	BMI	T	C	0.64022	-0.0122041	0.00207048	3.79997e-09	34.7432
	rs6494307	BMI	G	C	0.427072	-0.000445604	0.00200141	0.82	0.0495708
	rs6515236	BMI	C	A	0.249473	0.00308092	0.0022922	0.18	1.80657
	rs6531639	BMI	A	G	0.247548	-0.0136291	0.00233909	5.69994e-09	33.9501
	rs6545714	BMI	A	G	0.601448	-0.0205219	0.00201573	2.39994e-24	103.65
	rs6560906	BMI	C	T	0.691874	-0.012198	0.00214136	1.2e-08	32.4487
	rs6561937	BMI	A	T	0.753587	-0.015934	0.00230346	4.60045e-12	47.8507
	rs6567160	BMI	C	T	0.232714	0.0541723	0.00234213	2.30144e-118	534.974
	rs6572978	BMI	T	C	0.569435	-0.00190981	0.00200148	0.34	0.910496
	rs6575340	BMI	A	G	0.636038	0.0207333	0.00206189	8.69961e-24	101.113
	rs6597975	BMI	G	C	0.54389	0.013681	0.00199532	7.10068e-12	47.0122
	rs66679256	BMI	T	C	0.445826	0.0148864	0.00198759	6.89922e-14	56.0952
	rs6669189	BMI	T	C	0.401588	0.0171368	0.00201682	1.9002e-17	72.198
	rs6669341	BMI	G	A	0.582679	-0.0170287	0.0019986	1.59993e-17	72.5958
	rs6682438	BMI	C	T	0.673081	0.0131586	0.00210047	3.69999e-10	39.2452
	rs6696828	BMI	C	G	0.303943	0.0137805	0.00214061	1.2e-10	41.4433
	rs6705567	BMI	C	T	0.37596	-0.0146168	0.00204919	9.79941e-13	50.8792
	rs6707827	BMI	G	A	0.703627	0.0119437	0.00217332	3.89996e-08	30.2016
	rs6710091	BMI	G	C	0.348174	-0.0116835	0.00206707	1.6e-08	31.9474
	rs6713781	BMI	C	G	0.401882	-0.0135736	0.00202799	2.19989e-11	44.798
	rs67232546	BMI	T	C	0.212504	0.00255023	0.00243334	0.29	1.09838
	rs6725931	BMI	T	C	0.847658	0.0191046	0.00274403	3.29989e-12	48.4728
	rs6744646	BMI	G	A	0.828299	0.0554684	0.00261213	4.49987e-100	450.922
	rs6752979	BMI	A	G	0.31688	0.0125235	0.00211721	3.29997e-09	34.9884
	rs67609008	BMI	C	T	0.283614	0.0170863	0.0022021	8.60003e-15	60.2035
	rs6774894	BMI	A	T	0.358148	0.0133088	0.00205674	9.70063e-11	41.8715
	rs6795735	BMI	T	C	0.410796	0.00336346	0.00200345	0.0929994	2.81848
	rs6831088	BMI	A	G	0.640139	-0.0115222	0.0020591	2.19999e-08	31.3124
	rs6843852	BMI	T	C	0.507861	0.0130897	0.00197607	3.50026e-11	43.8788
	rs6878122	BMI	A	G	0.680494	0.00651843	0.00211942	0.0021	9.45915
	rs6909685	BMI	T	C	0.326809	-0.014612	0.00211352	4.70002e-12	47.7977
	rs6922607	BMI	G	A	0.189847	0.0148848	0.00251479	3.2e-09	35.0334
	rs6938973	BMI	C	T	0.601456	0.0182223	0.00201872	1.80011e-19	81.4806
	rs6950388	BMI	A	G	0.795086	0.0155219	0.00244806	2.30001e-10	40.2018
	rs6962980	BMI	C	A	0.556019	-0.0159568	0.00198814	1e-15	64.4166
	rs698147	BMI	G	A	0.543596	-0.0128512	0.00198514	9.60064e-11	41.9088
	rs6998660	BMI	G	A	0.452592	0.0125456	0.00198902	2.80001e-10	39.7836
	rs7024334	BMI	G	T	0.77914	-0.0138177	0.00238338	6.69993e-09	33.6113
	rs7027304	BMI	T	C	0.652661	0.0145492	0.00208703	3.10027e-12	48.5983
	rs7034554	BMI	G	A	0.373825	-0.0129826	0.00204252	2.1e-10	40.4009
	rs7038943	BMI	C	T	0.33879	-0.0140202	0.00208641	1.80011e-11	45.1553
	rs704061	BMI	C	T	0.45505	0.0146374	0.00198552	1.69981e-13	54.3475
	rs705145	BMI	A	C	0.34518	0.0139021	0.0020798	2.29985e-11	44.6805
	rs7070670	BMI	T	C	0.327923	-0.0123274	0.00211928	5.99998e-09	33.835
	rs7081254	BMI	C	T	0.205739	-0.0142516	0.00245216	6.19998e-09	33.7777
	rs7124681	BMI	A	C	0.408353	0.0256977	0.0020063	1.50003e-37	164.058
	rs7132908	BMI	A	G	0.384458	0.0297904	0.00203363	1.39991e-48	214.59
	rs7138300	BMI	T	C	0.556353	0.00107671	0.00199319	0.59	0.29181
	rs7144011	BMI	T	G	0.220936	0.0248528	0.00238774	2.29985e-25	108.337
	rs71495038	BMI	A	G	0.076936	0.0277998	0.00370969	6.70039e-14	56.1575
	rs7177055	BMI	A	G	0.717495	0.0111895	0.00219714	3.50002e-07	25.9362
	rs7185735	BMI	G	A	0.394539	0.0710791	0.00202232	1.30017e-270	1235.33
	rs7201895	BMI	A	G	0.354291	-0.0149781	0.00207999	6.00067e-13	51.855
	rs7206608	BMI	G	C	0.32162	0.0135122	0.00211797	1.79999e-10	40.7017
	rs7218014	BMI	C	T	0.197305	0.0189524	0.00249216	2.90001e-14	57.8331
	rs7232171	BMI	T	G	0.58263	0.0123404	0.00200821	8e-10	37.7607
	rs723672	BMI	T	C	0.43151	0.0111273	0.00200698	2.99999e-08	30.7393
	rs7240767	BMI	C	T	0.386972	-0.0033558	0.00203518	0.0990011	2.71886
	rs7259070	BMI	C	T	0.596062	0.021869	0.00203628	6.59933e-27	115.341
	rs72634826	BMI	A	G	0.259858	-0.021277	0.00228001	1e-20	87.0858
	rs72649373	BMI	C	T	0.143188	0.0178062	0.00287805	6.1e-10	38.2777
	rs72673947	BMI	G	A	0.107031	0.0218864	0.00321496	9.8992e-12	46.3444
	rs72892910	BMI	T	G	0.172232	0.0387798	0.00262053	1.50003e-49	218.994
	rs72976986	BMI	A	G	0.190123	-0.0232257	0.00254712	7.59976e-20	83.1455
	rs73026725	BMI	A	C	0.153534	-0.022318	0.00275052	4.90004e-16	65.8387
	rs73052033	BMI	C	T	0.18493	-0.0303929	0.00254634	7.70016e-33	142.466
	rs7306534	BMI	A	G	0.621712	-0.0112754	0.00205437	4.09996e-08	30.1236
	rs73124396	BMI	C	T	0.205144	-0.0154472	0.0024548	3.09999e-10	39.5975
	rs73142879	BMI	T	C	0.192297	-0.0266936	0.00252257	3.59998e-26	111.977
	rs73193736	BMI	G	A	0.243934	-0.0177165	0.00232002	2.19989e-14	58.3139
	rs73213484	BMI	T	A	0.141236	-0.0225766	0.0028364	1.69981e-15	63.3552
	rs7331420	BMI	A	G	0.285276	-0.0143702	0.00220081	6.59933e-11	42.6344
	rs7357754	BMI	G	A	0.500139	0.0141146	0.00198362	1.10002e-12	50.6314
	rs735949	BMI	C	T	0.140602	0.00138145	0.00284648	0.630001	0.235534
	rs73601548	BMI	T	C	0.114527	0.0177354	0.00311639	1.29999e-08	32.3876
	rs73985439	BMI	C	A	0.307299	0.0136616	0.00214059	1.7e-10	40.732
	rs7442885	BMI	G	C	0.214049	-0.0228163	0.00241251	3.19963e-21	89.4442
	rs745249	BMI	T	C	0.281945	0.0176118	0.00219724	1.10002e-15	64.2469
	rs74750282	BMI	C	T	0.086623	-0.0196382	0.00352561	2.5e-08	31.0266
	rs7498665	BMI	G	A	0.399659	0.0268646	0.00201997	2.29985e-40	176.877
	rs7516554	BMI	T	C	0.399941	0.0120066	0.00201565	2.59998e-09	35.4821
	rs7519259	BMI	A	G	0.52836	0.0140028	0.00198381	1.69981e-12	49.823
	rs753270	BMI	C	T	0.583611	0.0079956	0.00201589	7.29995e-05	15.7314
	rs754635	BMI	G	C	0.886582	0.0219925	0.0031093	1.50003e-12	50.0292
	rs75499503	BMI	T	C	0.220101	-0.0180331	0.00241845	8.9002e-14	55.5989
	rs7561798	BMI	G	A	0.480937	0.0139631	0.00197046	1.39991e-12	50.2144
	rs7568228	BMI	C	G	0.52717	-0.0119625	0.00197288	1.29999e-09	36.7657
	rs7571496	BMI	G	A	0.260545	-0.0158916	0.00225454	1.80011e-12	49.6843
	rs7572970	BMI	G	A	0.719744	0.00989659	0.00219399	6.49995e-06	20.3471
	rs76183894	BMI	C	T	0.080747	-0.0219584	0.00364437	1.7e-09	36.3042
	rs7619041	BMI	A	T	0.511305	-0.00429463	0.00197179	0.0290001	4.74384
	rs7619139	BMI	A	T	0.588616	0.0134537	0.00201061	2.19989e-11	44.7742
	rs76267866	BMI	T	A	0.206473	0.0141438	0.00243965	6.69993e-09	33.6107
	rs7651090	BMI	G	A	0.314523	-0.00276246	0.00212515	0.19	1.68971
	rs765874	BMI	A	T	0.489362	-0.0120592	0.00197569	1e-09	37.2563
	rs76702514	BMI	G	C	0.210623	-0.0164862	0.00243278	1.20005e-11	45.9236
	rs7674212	BMI	T	G	0.410281	-0.00807238	0.00201848	6.4e-05	15.9939
	rs7683836	BMI	A	G	0.557215	-0.0122469	0.00199427	8.19993e-10	37.7124
	rs7685296	BMI	T	C	0.280398	0.00221443	0.00220387	0.31	1.00961
	rs7704382	BMI	G	C	0.433528	0.0120126	0.00199631	1.79999e-09	36.2091
	rs7708584	BMI	G	A	0.572344	-0.0159321	0.0019949	1.39991e-15	63.7828
	rs77258096	BMI	A	C	0.10234	0.00173924	0.00327816	0.6	0.281487
	rs7729395	BMI	T	C	0.052297	0.00654237	0.00443727	0.14	2.17389
	rs7756992	BMI	G	A	0.266413	-0.00841676	0.00223197	0.00016	14.2204
	rs7761673	BMI	A	T	0.21988	-0.0135915	0.0023901	1.29999e-08	32.3372
	rs7762794	BMI	G	A	0.285408	0.0149077	0.00218606	9.09913e-12	46.5047
	rs7774	BMI	A	C	0.310467	0.014988	0.00215169	3.29989e-12	48.5208
	rs7776021	BMI	A	G	0.287599	0.0123701	0.00218251	1.40001e-08	32.1243
	rs7786095	BMI	G	A	0.1049	-0.001765	0.00322209	0.58	0.300064
	rs780094	BMI	C	T	0.61521	0.0080136	0.00202222	7.39997e-05	15.7036
	rs78012460	BMI	G	A	0.022673	-0.0370828	0.00666929	2.69998e-08	30.9162
	rs7802342	BMI	G	T	0.288566	0.0122748	0.00218145	1.79999e-08	31.662
	rs7805441	BMI	T	C	0.502261	0.0133747	0.00198884	1.80011e-11	45.2239
	rs784257	BMI	C	T	0.812541	0.0179315	0.00254968	1.99986e-12	49.4609
	rs7845219	BMI	C	T	0.495824	-0.000263209	0.00197984	0.89	0.0176743
	rs78605811	BMI	C	A	0.05405	-0.032737	0.00444673	1.80011e-13	54.1996
	rs78886584	BMI	G	A	0.491021	0.0116661	0.0019948	5e-09	34.2021
	rs7893571	BMI	T	G	0.665897	0.0140553	0.00210152	2.29985e-11	44.7315
	rs7923866	BMI	T	C	0.379864	0.00491791	0.00203665	0.016	5.8308
	rs7924036	BMI	T	G	0.503265	-0.0142836	0.0019778	5.10035e-13	52.1568
	rs7925100	BMI	A	G	0.396117	0.014725	0.0020221	3.29989e-13	53.028
	rs7929543	BMI	C	A	0.083333	0.0121983	0.00357721	0.000649995	11.6281
	rs7942037	BMI	C	G	0.360333	-0.0161952	0.00205793	3.59998e-15	61.9315
	rs7944782	BMI	G	T	0.509784	0.0157606	0.00198748	2.19989e-15	62.884
	rs7947143	BMI	A	G	0.163483	-0.0182782	0.00267522	8.30042e-12	46.6818
	rs7975187	BMI	G	A	0.213905	0.0151361	0.00241251	3.50002e-10	39.3631
	rs79780963	BMI	T	C	0.077428	0.0236803	0.00369591	1.5e-10	41.0517
	rs7979473	BMI	G	A	0.612938	0.000909489	0.00204587	0.66	0.197624
	rs7996639	BMI	A	G	0.449354	0.0145559	0.00200245	3.59998e-13	52.839
	rs80135274	BMI	T	A	0.070324	0.021339	0.00388113	3.79997e-08	30.2296
	rs8015400	BMI	A	C	0.677097	0.0213422	0.00211709	6.70039e-24	101.625
	rs8020365	BMI	A	T	0.220464	0.0251068	0.00239517	1e-25	109.878
	rs8022405	BMI	C	T	0.432071	-0.00702591	0.00200882	0.000470002	12.2327
	rs8024137	BMI	T	A	0.848207	0.0156329	0.00276778	1.6e-08	31.9019
	rs8025516	BMI	G	T	0.645928	-0.0146558	0.00207578	1.69981e-12	49.849
	rs8047587	BMI	T	G	0.439435	0.0676323	0.00199438	4.4978e-252	1149.99
	rs8063946	BMI	T	C	0.05448	-0.0251967	0.00436586	7.90005e-09	33.3079
	rs8068804	BMI	A	G	0.32644	0.00950807	0.00211243	6.80002e-06	20.2591
	rs8076669	BMI	C	T	0.561561	0.0140681	0.00199601	1.80011e-12	49.6759
	rs8089514	BMI	A	T	0.36868	0.012988	0.00207588	3.89996e-10	39.1453
	rs8108269	BMI	G	T	0.281353	0.00076834	0.00220078	0.73	0.121886
	rs8112818	BMI	G	A	0.400329	-0.020696	0.00202712	1.80011e-24	104.235
	rs812936	BMI	A	G	0.820786	0.00407884	0.00257927	0.11	2.5008
	rs8132491	BMI	A	G	0.313023	-0.015375	0.00219317	2.39994e-12	49.1457
	rs815163	BMI	C	T	0.563148	-0.016485	0.00198582	1e-16	68.9125
	rs825476	BMI	T	C	0.580959	-0.00817885	0.00200249	4.39997e-05	16.6818
	rs838134	BMI	C	A	0.277324	0.00838464	0.00225766	0.0002	13.7928
	rs840967	BMI	A	C	0.608401	-0.00118756	0.00202015	0.56	0.345576
	rs849135	BMI	A	G	0.500901	0.0114529	0.00197626	6.80002e-09	33.5848
	rs852042	BMI	G	A	0.758575	-0.0131207	0.00231309	1.40001e-08	32.1758
	rs853974	BMI	C	T	0.737638	0.00816488	0.00224989	0.000280001	13.1697
	rs862320	BMI	T	C	0.40965	-0.0231703	0.00201345	1.20005e-30	132.429
	rs879620	BMI	T	C	0.613237	0.0241136	0.00203595	2.29985e-32	140.278
	rs909892	BMI	A	G	0.134817	-0.0184105	0.00291255	2.59998e-10	39.9562
	rs923994	BMI	G	A	0.783195	-0.0145761	0.00240219	1.29999e-09	36.8187
	rs9291822	BMI	T	C	0.514868	-0.014263	0.00199464	8.60003e-13	51.132
	rs9294260	BMI	A	G	0.476559	0.014782	0.00198818	1e-13	55.2783
	rs9349235	BMI	T	C	0.410635	0.0111809	0.00200924	2.59998e-08	30.9663
	rs935166	BMI	A	G	0.506805	-0.0161066	0.00197292	3.19963e-16	66.6483
	rs9366863	BMI	C	T	0.671833	-0.0285083	0.00210043	5.79963e-42	184.216
	rs9369425	BMI	A	G	0.707454	0.00228686	0.00216945	0.29	1.11117
	rs9388446	BMI	A	T	0.515653	0.0111013	0.00197919	2e-08	31.461
	rs9461887	BMI	T	C	0.277069	0.0148892	0.00220206	1.39991e-11	45.7177
	rs9463175	BMI	T	C	0.338958	-0.0115	0.00210115	4.39997e-08	29.9558
	rs9478496	BMI	C	T	0.164225	0.0181836	0.00267493	1.10002e-11	46.2099
	rs9515446	BMI	G	A	0.447709	0.0151051	0.00199052	3.19963e-14	57.5856
	rs9522180	BMI	T	C	0.553392	-0.0141095	0.00199325	1.50003e-12	50.1072
	rs9571687	BMI	A	C	0.329363	-0.0135388	0.0021094	1.40001e-10	41.1948
	rs961498	BMI	C	G	0.503131	0.011981	0.00199336	1.79999e-09	36.1256
	rs963740	BMI	T	A	0.295656	0.000876552	0.00216867	0.69	0.163369
	rs9638713	BMI	G	A	0.97477	-0.0361735	0.00635399	1.2e-08	32.4107
	rs9673839	BMI	G	A	0.490967	0.0130337	0.00198783	5.50047e-11	42.9909
	rs9674487	BMI	G	C	0.001338	0.158445	0.0286171	3.09999e-08	30.6553
	rs982077	BMI	G	A	0.567933	-0.00381928	0.00200004	0.0560003	3.64658
	rs9830592	BMI	A	C	0.582421	0.0154849	0.00200164	1e-14	59.8473
	rs9839081	BMI	A	G	0.325232	-0.011701	0.00214045	4.60002e-08	29.8838
	rs9843653	BMI	C	T	0.511652	0.0294509	0.00197538	2.90001e-50	222.278
	rs9844972	BMI	C	G	0.071233	0.00134355	0.00390437	0.73	0.118415
	rs9876664	BMI	T	G	0.375389	-0.0180478	0.00204174	9.60064e-19	78.1354
	rs9888533	BMI	T	C	0.538079	0.0120038	0.0020182	2.69998e-09	35.376
	rs9894220	BMI	G	A	0.434054	-0.0106413	0.0019954	9.69996e-08	28.44
	rs9926784	BMI	C	T	0.184576	-0.023818	0.00254677	8.60003e-21	87.4644
	rs9931586	BMI	G	C	0.270097	-0.0122407	0.00224111	4.70002e-08	29.8323
	rs993380	BMI	G	A	0.66698	0.00225887	0.00209223	0.28	1.16564
	rs9940149	BMI	A	G	0.179572	-0.00125877	0.00257391	0.62	0.23917
	rs9951619	BMI	G	T	0.767369	0.0144231	0.00235777	9.49992e-10	37.4209
	rs10063055	Galectin-3	T	C	0.2458	-0.0019	0.0108	0.8603	0.0309499
	rs10077431	Galectin-3	A	C	0.2086	0.0006	0.0115	0.9618	0.00272212
	rs10087241	Galectin-3	A	G	0.6021	0.0038	0.01	0.7051	0.1444
	rs10100265	Galectin-3	C	A	0.586	0.0005	0.0096	0.9617	0.00271267
	rs10114341	Galectin-3	C	T	0.4396	-0.0126	0.0094	0.1825	1.79674
	rs10160769	Galectin-3	C	G	0.2297	-0.0005	0.0111	0.9625	0.00202906
	rs10172483	Galectin-3	T	A	0.2333	-0.0034	0.011	0.756201	0.0955372
	rs10182416	Galectin-3	G	A	0.4972	-0.0041	0.0096	0.6716	0.1824
	rs10184537	Galectin-3	T	C	0.3538	0.0035	0.0106	0.738901	0.109025
	rs10401969	Galectin-3	C	T	0.0801	-0.0591	0.0156	0.000147001	14.3524
	rs10402950	Galectin-3	C	T	0.2697	0.0032	0.0104	0.7582	0.0946746
	rs10423928	Galectin-3	A	T	0.2107	-0.0184	0.0112	0.1003	2.69898
	rs1050226	Galectin-3	G	A	0.402	-0.005	0.0097	0.6058	0.265703
	rs10505836	Galectin-3	C	A	0.8434	-0.0022	0.0124	0.858	0.0314776
	rs10510025	Galectin-3	T	C	0.2547	-0.0146	0.0108	0.1758	1.8275
	rs1061813	Galectin-3	A	G	0.5632	0.0034	0.0096	0.7247	0.125434
	rs1063355	Galectin-3	G	T	0.5649	-0.0237	0.0103	0.02113	5.29447
	rs1064213	Galectin-3	A	G	0.4774	-0.0059	0.0096	0.5417	0.377713
	rs10740322	Galectin-3	A	G	0.6709	-0.0011	0.0105	0.9169	0.0109751
	rs10742752	Galectin-3	C	T	0.6128	-0.009	0.0097	0.3546	0.860878
	rs10760277	Galectin-3	T	C	0.3955	0.0004	0.0098	0.9661	0.00166597
	rs10771041	Galectin-3	T	C	0.1315	0.0008	0.0141	0.955	0.00321915
	rs10780248	Galectin-3	A	G	0.5612	-0.0109	0.0095	0.2496	1.31645
	rs1078141	Galectin-3	T	C	0.3635	0.0015	0.0103	0.8867	0.0212084
	rs10799778	Galectin-3	G	T	0.8357	-0.0041	0.0127	0.7465	0.104222
	rs10811661	Galectin-3	C	T	0.1784	-0.0107	0.012	0.3729	0.795069
	rs10824211	Galectin-3	T	C	0.1328	-0.0132	0.0134	0.3258	0.970372
	rs10830963	Galectin-3	G	C	0.2837	0.0071	0.0103	0.4888	0.475163
	rs10832778	Galectin-3	G	C	0.6088	0.0036	0.0095	0.7063	0.143601
	rs10842994	Galectin-3	T	C	0.1952	0.0148	0.0115	0.1978	1.65626
	rs10887578	Galectin-3	C	G	0.4859	0.0073	0.0098	0.4533	0.554873
	rs10927006	Galectin-3	C	T	0.1565	0.0122	0.0127	0.3349	0.92281
	rs10960293	Galectin-3	T	G	0.3238	-0.0061	0.0102	0.5508	0.357651
	rs10974438	Galectin-3	C	A	0.3667	0.0083	0.0099	0.4008	0.702887
	rs10989067	Galectin-3	A	G	0.3386	0.0039	0.0109	0.722199	0.12802
	rs11001963	Galectin-3	T	C	0.5572	0.0161	0.0103	0.1196	2.4433
	rs11009685	Galectin-3	T	C	0.2367	-0.0071	0.0118	0.5495	0.362037
	rs11012732	Galectin-3	G	A	0.3151	0.0007	0.0105	0.9435	0.00444444
	rs11057072	Galectin-3	G	A	0.2212	0.0007	0.0111	0.9515	0.00397695
	rs11079849	Galectin-3	T	C	0.3127	-0.0045	0.0104	0.6627	0.187223
	rs11098676	Galectin-3	C	T	0.7909	0.0134	0.0121	0.2682	1.22642
	rs11099020	Galectin-3	T	C	0.6384	0.0136	0.0107	0.2015	1.61551
	rs11107116	Galectin-3	T	G	0.219	0.0201	0.0111	0.0714793	3.27904
	rs11115160	Galectin-3	A	G	0.2363	-0.0044	0.0109	0.686099	0.162949
	rs11122450	Galectin-3	G	T	0.5977	0.0216	0.0094	0.02231	5.28022
	rs11134679	Galectin-3	G	A	0.6855	-0.0197	0.0105	0.0596499	3.52009
	rs11150745	Galectin-3	G	A	0.3167	-0.0143	0.0112	0.2041	1.63018
	rs111598585	Galectin-3	T	C	0.2009	-0.0145	0.0123	0.2384	1.38972
	rs11161044	Galectin-3	C	G	0.7817	0.0026	0.012	0.8263	0.0469444
	rs11165643	Galectin-3	T	C	0.5784	0.0095	0.0095	0.3164	1
	rs111689389	Galectin-3	C	G	0.2821	0.0125	0.0112	0.2607	1.24562
	rs11218510	Galectin-3	A	G	0.3938	0.0116	0.0104	0.2647	1.24408
	rs11250094	Galectin-3	C	G	0.5247	0.0006	0.0094	0.9488	0.00407424
	rs11257655	Galectin-3	T	C	0.2196	0.0029	0.0112	0.7967	0.067044
	rs1126930	Galectin-3	C	G	0.0484	0.0026	0.0214	0.9016	0.0147611
	rs1127655	Galectin-3	T	C	0.5296	-0.0202	0.0096	0.0343503	4.42752
	rs113079574	Galectin-3	T	C	0.2101	-0.0077	0.0122	0.5298	0.398347
	rs113166493	Galectin-3	T	C	0.0935	-0.2037	0.0164	2.28192e-35	154.275
	rs113603865	Galectin-3	T	C	0.2139	-0.0005	0.0115	0.964	0.00189036
	rs113624107	Galectin-3	A	G	0.2274	-0.0192	0.011	0.0810793	3.04661
	rs11525873	Galectin-3	C	T	0.0916	0.0015	0.0158	0.9231	0.00901298
	rs11607476	Galectin-3	C	A	0.4849	-0.0023	0.0095	0.8104	0.058615
	rs11608710	Galectin-3	G	T	0.0659	-0.0113	0.0174	0.5146	0.421753
	rs11610621	Galectin-3	A	T	0.1348	-0.0235	0.0135	0.0811895	3.03018
	rs11630647	Galectin-3	A	G	0.2442	-0.0173	0.0114	0.1278	2.30294
	rs11634851	Galectin-3	G	C	0.4484	-0.0192	0.0094	0.0415203	4.17202
	rs116374395	Galectin-3	A	G	0.0392	-0.0006	0.0263	0.9814	0.000520464
	rs11642090	Galectin-3	C	T	0.366	-0.0071	0.0099	0.4738	0.514335
	rs11656076	Galectin-3	A	G	0.231	0.022	0.0114	0.0538902	3.72422
	rs1167311	Galectin-3	A	G	0.6627	0.0091	0.0099	0.3593	0.844914
	rs11691869	Galectin-3	A	C	0.3549	0.0009	0.01	0.932	0.0081
	rs11699828	Galectin-3	A	G	0.0361	-0.0085	0.0348	0.807	0.0596595
	rs11708067	Galectin-3	G	A	0.2168	-0.0138	0.0113	0.2218	1.49142
	rs11709402	Galectin-3	G	A	0.2622	-0.0073	0.0106	0.4867	0.474279
	rs117118217	Galectin-3	C	G	0.0153	-0.0879	0.0551	0.1105	2.54492
	rs11757278	Galectin-3	C	T	0.3361	-0.0238	0.0099	0.0157601	5.77941
	rs11778219	Galectin-3	G	A	0.1642	-0.0053	0.0128	0.677599	0.171448
	rs118136827	Galectin-3	T	G	0.2689	-0.0034	0.0107	0.753	0.10097
	rs1191600	Galectin-3	A	C	0.5894	-0.0012	0.0097	0.9053	0.0153045
	rs11919665	Galectin-3	T	A	0.6838	-0.0018	0.0101	0.858	0.0317616
	rs11925227	Galectin-3	A	G	0.1873	-0.0006	0.0122	0.9599	0.0024187
	rs11926707	Galectin-3	C	T	0.6299	0.0057	0.0099	0.5626	0.331497
	rs12072739	Galectin-3	G	A	0.2392	-0.0008	0.0109	0.9414	0.00538675
	rs12088739	Galectin-3	G	A	0.0932	-0.0196	0.0149	0.1888	1.73037
	rs12089815	Galectin-3	A	G	0.5241	-0.0098	0.0098	0.3215	1
	rs12101393	Galectin-3	G	C	0.2221	-0.0094	0.0112	0.4035	0.704401
	rs12140153	Galectin-3	T	G	0.106	-0.0027	0.0153	0.8589	0.0311419
	rs12149660	Galectin-3	A	G	0.1319	-0.0034	0.0145	0.8146	0.0549822
	rs12259464	Galectin-3	A	G	0.4704	0.0068	0.0101	0.4997	0.453289
	rs12273545	Galectin-3	T	C	0.0579	0.0224	0.0213	0.2928	1.10595
	rs12299509	Galectin-3	G	A	0.4714	-0.0297	0.0101	0.00319499	8.64709
	rs1229984	Galectin-3	C	T	0.9432	-0.0562	0.0319	0.0784603	3.10378
	rs12340969	Galectin-3	T	C	0.4508	0.008	0.0096	0.4067	0.694444
	rs12364470	Galectin-3	G	T	0.184	-0.0185	0.012	0.1224	2.37674
	rs12440603	Galectin-3	T	C	0.4123	-0.0019	0.0096	0.8456	0.039171
	rs12462975	Galectin-3	A	G	0.3327	0.001	0.0103	0.9207	0.00942596
	rs12507026	Galectin-3	T	A	0.4245	0.0043	0.0095	0.6511	0.204875
	rs12541408	Galectin-3	C	T	0.3415	0.0027	0.0099	0.7891	0.0743802
	rs12617659	Galectin-3	T	C	0.1483	0.0024	0.0128	0.853	0.0351562
	rs1263629	Galectin-3	G	A	0.1417	0.0031	0.0139	0.8226	0.0497386
	rs1266874	Galectin-3	G	A	0.3761	-0.0003	0.0104	0.9795	0.000832101
	rs12681792	Galectin-3	A	C	0.1986	0.0034	0.0123	0.7817	0.0764095
	rs12692596	Galectin-3	T	C	0.3528	0.0131	0.0097	0.1767	1.82389
	rs12696039	Galectin-3	G	A	0.14	0.0208	0.0131	0.1116	2.52107
	rs12712767	Galectin-3	A	G	0.3682	-0.001	0.01	0.9234	0.01
	rs1286058	Galectin-3	A	T	0.7111	-0.0064	0.0103	0.533301	0.386087
	rs12881629	Galectin-3	G	A	0.085	0.0003	0.0167	0.9878	0.000322708
	rs12910825	Galectin-3	G	A	0.3806	-0.0222	0.0096	0.0207898	5.34766
	rs12921986	Galectin-3	G	A	0.0824	-0.0363	0.0164	0.0265797	4.8992
	rs12937411	Galectin-3	T	C	0.4019	0.0002	0.0096	0.9866	0.000434028
	rs12945601	Galectin-3	C	T	0.5834	-0.0142	0.0095	0.1327	2.23424
	rs1296328	Galectin-3	C	A	0.5362	0.002	0.0105	0.852	0.0362812
	rs12970134	Galectin-3	A	G	0.2604	-0.0096	0.0105	0.3622	0.835918
	rs12974458	Galectin-3	T	C	0.5167	0.0081	0.0101	0.4239	0.643172
	rs13012070	Galectin-3	A	G	0.2325	0.0062	0.0109	0.574	0.323542
	rs13033310	Galectin-3	A	G	0.2601	-0.0014	0.0106	0.8965	0.0174439
	rs13097918	Galectin-3	A	T	0.2305	0.0035	0.0113	0.757699	0.0959355
	rs13107325	Galectin-3	T	C	0.0658	0.0139	0.0216	0.519501	0.414116
	rs13176429	Galectin-3	C	T	0.663	-0.002	0.0104	0.8511	0.0369822
	rs1320251	Galectin-3	T	C	0.4733	-0.009	0.0095	0.3454	0.897507
	rs13218383	Galectin-3	G	C	0.3521	0.0051	0.0099	0.6061	0.265381
	rs1322842	Galectin-3	G	A	0.625	0.0189	0.01	0.0577205	3.5721
	rs13234269	Galectin-3	A	T	0.4822	-0.0127	0.0094	0.1769	1.82537
	rs13239186	Galectin-3	T	C	0.3228	-0.011	0.0101	0.274	1.18616
	rs13248187	Galectin-3	C	T	0.2677	0.0101	0.011	0.3589	0.843058
	rs1327259	Galectin-3	G	A	0.4058	-0.0058	0.0106	0.5835	0.299395
	rs13291723	Galectin-3	A	G	0.5614	0.011	0.0102	0.2836	1.16301
	rs1333039	Galectin-3	C	G	0.5943	0.0117	0.0096	0.2196	1.48535
	rs13330951	Galectin-3	G	A	0.4906	0.0146	0.0096	0.13	2.31293
	rs13389219	Galectin-3	T	C	0.3933	-0.0035	0.0096	0.7168	0.132921
	rs13427822	Galectin-3	G	A	0.2781	0.0114	0.0108	0.2924	1.1142
	rs1346841	Galectin-3	A	G	0.3953	-0.0053	0.0106	0.619599	0.25
	rs1359790	Galectin-3	A	G	0.27	-0.0056	0.0105	0.595899	0.284444
	rs1360201	Galectin-3	T	C	0.4912	0.0012	0.0095	0.9024	0.0159557
	rs140159717	Galectin-3	T	C	0.0874	-0.0105	0.0174	0.5472	0.36415
	rs1411432	Galectin-3	C	A	0.1815	-0.0001	0.012	0.992	6.94444e-05
	rs1438945	Galectin-3	A	T	0.7233	0.0156	0.0107	0.1456	2.1256
	rs1441264	Galectin-3	A	G	0.6121	-0.0037	0.0097	0.6998	0.145499
	rs1451963	Galectin-3	T	G	0.0749	-0.0047	0.0174	0.7861	0.0729621
	rs1454687	Galectin-3	G	C	0.5336	0.017	0.0094	0.0710706	3.27071
	rs1458156	Galectin-3	T	C	0.4851	-0.0098	0.0097	0.3158	1.02072
	rs145981104	Galectin-3	G	A	0.0632	-0.0016	0.0175	0.9279	0.00835918
	rs146569428	Galectin-3	A	G	0.2023	-0.0012	0.0117	0.9208	0.0105194
	rs1471093	Galectin-3	A	G	0.5979	-0.0042	0.0098	0.6691	0.183673
	rs1471740	Galectin-3	C	T	0.759	-0.0119	0.011	0.2796	1.17033
	rs147568678	Galectin-3	C	T	0.2319	0.0035	0.0119	0.767499	0.0865052
	rs1477290	Galectin-3	C	T	0.1433	0.008	0.013	0.541	0.378698
	rs147730268	Galectin-3	T	G	0.0854	-0.0169	0.0158	0.2851	1.14409
	rs1496653	Galectin-3	G	A	0.2182	0.0038	0.0111	0.7319	0.117198
	rs1503526	Galectin-3	C	T	0.4963	0.0033	0.0095	0.730801	0.120665
	rs1552224	Galectin-3	C	A	0.1666	0.0026	0.0123	0.8306	0.0446824
	rs156201	Galectin-3	C	G	0.7327	0.0067	0.0113	0.555199	0.351555
	rs1582931	Galectin-3	A	G	0.4828	-0.0098	0.0097	0.3128	1.02072
	rs1608113	Galectin-3	T	A	0.3842	-0.0193	0.0097	0.0463298	3.95887
	rs1609010	Galectin-3	G	A	0.5477	0.0168	0.0094	0.0740696	3.19421
	rs16965658	Galectin-3	G	A	0.0588	-0.0032	0.0219	0.8825	0.0213507
	rs16988333	Galectin-3	G	A	0.08	0.0167	0.0155	0.2834	1.16083
	rs17056301	Galectin-3	C	T	0.2663	-0.0096	0.0108	0.3744	0.790123
	rs17086692	Galectin-3	T	G	0.3238	-0.0083	0.0109	0.4444	0.579833
	rs17132130	Galectin-3	C	G	0.2452	0.0131	0.0106	0.2191	1.52732
	rs17149254	Galectin-3	C	T	0.7712	-0.0381	0.0148	0.009846	6.62715
	rs17168486	Galectin-3	T	C	0.1793	-0.0242	0.0118	0.0401098	4.20598
	rs17289010	Galectin-3	G	A	0.3224	-0.0062	0.0107	0.5644	0.33575
	rs17334919	Galectin-3	T	C	0.0915	0.0062	0.0152	0.6829	0.166378
	rs17399739	Galectin-3	G	A	0.0746	-0.0026	0.0171	0.8809	0.0231182
	rs17405722	Galectin-3	A	G	0.0824	0.0169	0.0155	0.2778	1.1888
	rs17411031	Galectin-3	G	C	0.2549	-0.0066	0.0107	0.538801	0.38047
	rs17446299	Galectin-3	G	C	0.16	0.0075	0.0125	0.5495	0.36
	rs17544384	Galectin-3	C	T	0.1992	-0.012	0.0114	0.2917	1.10803
	rs1758632	Galectin-3	G	C	0.6067	0.0003	0.0096	0.9721	0.000976562
	rs17631783	Galectin-3	T	C	0.2704	0.007	0.0108	0.5152	0.420096
	rs17668356	Galectin-3	G	C	0.144	-0.0033	0.0132	0.8047	0.0625
	rs17724992	Galectin-3	G	A	0.2617	-0.0013	0.0107	0.9005	0.0147611
	rs17770336	Galectin-3	T	C	0.3195	0.01	0.0099	0.3135	1.0203
	rs1778830	Galectin-3	A	G	0.3654	-0.0066	0.0102	0.5202	0.418685
	rs17791483	Galectin-3	G	A	0.0755	0.0159	0.0165	0.337	0.928595
	rs1788808	Galectin-3	G	A	0.5006	-0.0048	0.0095	0.615601	0.255291
	rs1793636	Galectin-3	C	G	0.2913	-0.0037	0.0107	0.728799	0.119574
	rs1801214	Galectin-3	T	C	0.5943	-0.0136	0.0095	0.1522	2.04942
	rs1805123	Galectin-3	G	T	0.2254	0.0017	0.0111	0.875	0.0234559
	rs1834144	Galectin-3	A	C	0.389	0.0072	0.0098	0.4605	0.539775
	rs1860750	Galectin-3	A	T	0.497	-0.0093	0.0097	0.3346	0.919226
	rs1861410	Galectin-3	T	C	0.5628	-0.0188	0.0096	0.0499298	3.83507
	rs1884897	Galectin-3	G	A	0.6422	-0.0048	0.0097	0.6229	0.244872
	rs1899951	Galectin-3	T	C	0.1309	0.0269	0.0133	0.0439501	4.09073
	rs1919243	Galectin-3	C	T	0.4695	-0.009	0.0097	0.3524	0.860878
	rs1928706	Galectin-3	A	G	0.4768	-0.0099	0.0102	0.3291	0.942042
	rs1934102	Galectin-3	A	G	0.3414	0.0154	0.0104	0.1378	2.19268
	rs1967772	Galectin-3	A	G	0.2642	0.0095	0.0107	0.3785	0.788278
	rs1990662	Galectin-3	C	A	0.1903	-0.0077	0.0117	0.510301	0.433121
	rs2035936	Galectin-3	T	G	0.0608	0.0282	0.0172	0.1021	2.68807
	rs2051559	Galectin-3	C	T	0.13	0.0149	0.0144	0.3004	1.07065
	rs2075466	Galectin-3	C	G	0.2585	0.0099	0.0106	0.3528	0.872286
	rs2102278	Galectin-3	G	A	0.303	0.0207	0.011	0.0594895	3.54124
	rs2133561	Galectin-3	T	A	0.623	-0.004	0.0104	0.704601	0.147929
	rs213518	Galectin-3	C	T	0.1361	-0.0015	0.0129	0.9098	0.0135208
	rs2153740	Galectin-3	G	A	0.4864	-0.0091	0.0102	0.3755	0.795944
	rs215634	Galectin-3	G	A	0.6166	-0.0005	0.0102	0.959	0.00240292
	rs2172131	Galectin-3	C	T	0.57	0.0013	0.0097	0.8968	0.0179615
	rs217672	Galectin-3	C	A	0.2587	0.0052	0.0106	0.6265	0.240655
	rs2191348	Galectin-3	T	G	0.5294	-0.0056	0.0096	0.557799	0.340278
	rs2192158	Galectin-3	G	A	0.5414	-0.0091	0.0102	0.3692	0.795944
	rs2193101	Galectin-3	G	C	0.7915	-0.0015	0.0119	0.8967	0.0158887
	rs2216931	Galectin-3	A	C	0.6792	-0.0003	0.0102	0.974	0.000865052
	rs2234458	Galectin-3	T	C	0.6523	-0.0169	0.01	0.0903795	2.8561
	rs2237892	Galectin-3	T	C	0.0688	-0.0032	0.0198	0.8731	0.0261198
	rs2246618	Galectin-3	T	C	0.3179	0.0093	0.0101	0.3535	0.847858
	rs2249825	Galectin-3	C	G	0.2762	-0.0146	0.0105	0.1633	1.93342
	rs2253310	Galectin-3	G	C	0.6121	0.0091	0.0096	0.3437	0.898546
	rs2261181	Galectin-3	T	C	0.0941	0.0126	0.0148	0.3937	0.724799
	rs2271189	Galectin-3	A	G	0.4042	-0.0057	0.0097	0.553701	0.345308
	rs2275003	Galectin-3	G	A	0.534	-0.0098	0.0094	0.2949	1.08692
	rs2289379	Galectin-3	T	C	0.4046	-0.0284	0.01	0.00448497	8.0656
	rs2292662	Galectin-3	T	C	0.1697	-0.019	0.0125	0.1283	2.3104
	rs2294120	Galectin-3	G	A	0.4694	-0.0014	0.0096	0.8841	0.0212674
	rs2296173	Galectin-3	G	A	0.2101	-0.001	0.0112	0.9274	0.00797194
	rs2299383	Galectin-3	T	C	0.4355	-0.0089	0.0096	0.3545	0.859484
	rs2307111	Galectin-3	C	T	0.4089	0.002	0.0095	0.8308	0.0443213
	rs2342892	Galectin-3	G	T	0.5248	0.0117	0.0102	0.2545	1.31574
	rs2381404	Galectin-3	C	T	0.2292	-0.0041	0.0114	0.716699	0.129347
	rs2396625	Galectin-3	A	T	0.4319	-0.0118	0.0101	0.2428	1.36496
	rs2398861	Galectin-3	G	A	0.2774	0.0044	0.0104	0.6711	0.178994
	rs2425816	Galectin-3	A	G	0.3909	-0.0136	0.0104	0.1904	1.71006
	rs243019	Galectin-3	C	T	0.467	-0.0187	0.0094	0.0478101	3.95756
	rs2433733	Galectin-3	A	G	0.669	0.0006	0.0103	0.95	0.00339335
	rs2439823	Galectin-3	G	A	0.5406	-0.0136	0.0096	0.1592	2.00694
	rs2482356	Galectin-3	C	T	0.41	-0.0105	0.0103	0.3083	1.03921
	rs2493394	Galectin-3	G	A	0.1094	-0.0306	0.0141	0.0302099	4.70982
	rs2512892	Galectin-3	C	T	0.5639	-0.0071	0.0098	0.471	0.524885
	rs252761	Galectin-3	T	G	0.585	0.0127	0.0098	0.193	1.6794
	rs2568958	Galectin-3	A	G	0.6169	-0.0205	0.0096	0.0328299	4.56
	rs2569993	Galectin-3	C	T	0.3413	0.0132	0.0107	0.2165	1.52188
	rs2606228	Galectin-3	C	A	0.647	0.0072	0.01	0.4753	0.5184
	rs2616143	Galectin-3	A	G	0.3136	-0.0066	0.0111	0.554	0.353543
	rs2618039	Galectin-3	T	A	0.4054	-0.0068	0.01	0.4965	0.4624
	rs2678204	Galectin-3	G	T	0.3258	-0.0035	0.01	0.7262	0.1225
	rs2725371	Galectin-3	G	A	0.7182	-0.011	0.0109	0.3093	1.01843
	rs2781668	Galectin-3	T	C	0.1681	0.0191	0.0123	0.12	2.41133
	rs2791643	Galectin-3	T	C	0.7604	0.0114	0.011	0.301	1.07405
	rs2796441	Galectin-3	A	G	0.4131	0.008	0.0095	0.3993	0.709141
	rs2820426	Galectin-3	G	A	0.6202	-0.0288	0.0097	0.00298703	8.81539
	rs28350	Galectin-3	G	A	0.8066	-0.0028	0.0121	0.8173	0.0535483
	rs28366156	Galectin-3	C	T	0.1147	0.0104	0.0146	0.4742	0.507412
	rs2837996	Galectin-3	C	T	0.6434	0.0143	0.0101	0.156	2.00461
	rs28404639	Galectin-3	T	C	0.3377	0.0158	0.0104	0.1274	2.30806
	rs28489620	Galectin-3	A	G	0.2941	0.0138	0.0109	0.2065	1.6029
	rs2861685	Galectin-3	C	T	0.4072	-0.0227	0.0096	0.01761	5.59125
	rs28670671	Galectin-3	C	T	0.3087	0.0079	0.013	0.5419	0.36929
	rs2867125	Galectin-3	C	T	0.8232	0.0114	0.0118	0.3342	0.933352
	rs2870111	Galectin-3	T	C	0.4163	-0.0094	0.0097	0.3336	0.939101
	rs2875762	Galectin-3	C	G	0.2253	-0.0276	0.0121	0.0222998	5.20292
	rs2899644	Galectin-3	T	C	0.2456	-0.0091	0.011	0.4071	0.68438
	rs2908282	Galectin-3	A	G	0.1701	0.0094	0.0121	0.4362	0.603511
	rs2920503	Galectin-3	T	C	0.2952	-0.0099	0.0103	0.3363	0.923838
	rs2925979	Galectin-3	C	T	0.686	-0.0104	0.0101	0.3026	1.06029
	rs2941452	Galectin-3	G	A	0.6034	0.0076	0.0102	0.4531	0.555171
	rs2962334	Galectin-3	T	G	0.0242	-0.0352	0.0354	0.3201	0.988732
	rs2972144	Galectin-3	G	A	0.6434	-0.0033	0.0097	0.7366	0.11574
	rs317656	Galectin-3	A	T	0.7177	-0.0277	0.0106	0.009234	6.82885
	rs3212038	Galectin-3	G	A	0.3433	0.0047	0.0099	0.6367	0.225385
	rs3213943	Galectin-3	A	C	0.2065	-0.0068	0.0118	0.5641	0.332088
	rs32421	Galectin-3	T	A	0.221	-0.0137	0.0119	0.2519	1.3254
	rs329118	Galectin-3	T	C	0.4297	0.0057	0.0095	0.5478	0.36
	rs329651	Galectin-3	T	G	0.8312	0.0161	0.0122	0.1886	1.74153
	rs34045288	Galectin-3	T	C	0.3193	0.004	0.0108	0.708699	0.137174
	rs340874	Galectin-3	C	T	0.5276	0.0011	0.0094	0.9077	0.013694
	rs34153025	Galectin-3	C	T	0.0208	0.0283	0.0397	0.4753	0.50815
	rs34234296	Galectin-3	A	G	0.3748	0.005	0.011	0.6463	0.206612
	rs34481751	Galectin-3	A	C	0.1731	0.0117	0.0124	0.3485	0.890284
	rs34517439	Galectin-3	A	C	0.1124	0.0262	0.015	0.0801807	3.05084
	rs34696181	Galectin-3	C	T	0.4671	0.0031	0.0098	0.7503	0.100062
	rs347551	Galectin-3	G	C	0.4807	-0.0133	0.0108	0.2173	1.51655
	rs34811474	Galectin-3	A	G	0.2288	-0.0001	0.012	0.9952	6.94444e-05
	rs348330	Galectin-3	A	G	0.6236	0.0159	0.0105	0.1308	2.29306
	rs349071	Galectin-3	A	G	0.5032	-0.0101	0.0102	0.3211	0.980488
	rs35011184	Galectin-3	A	G	0.2199	0.0133	0.0111	0.23	1.43568
	rs35154326	Galectin-3	G	A	0.2894	-0.0164	0.0115	0.1529	2.03372
	rs35364449	Galectin-3	T	C	0.1187	-0.0043	0.0143	0.764901	0.0904201
	rs355777	Galectin-3	C	G	0.4156	-0.0058	0.0096	0.5463	0.365017
	rs35697587	Galectin-3	A	G	0.4992	-0.0187	0.0098	0.0560003	3.64109
	rs35697691	Galectin-3	G	C	0.0851	0.0245	0.0169	0.1462	2.10164
	rs35809007	Galectin-3	A	G	0.3742	-0.0077	0.0101	0.4451	0.581218
	rs35957544	Galectin-3	T	G	0.5681	-0.0181	0.01	0.0709807	3.2761
	rs36007635	Galectin-3	A	G	0.1225	0.0082	0.0134	0.541499	0.374471
	rs36061954	Galectin-3	T	C	0.3912	0.003	0.01	0.760699	0.09
	rs3735080	Galectin-3	T	C	0.2395	0.0943	0.0109	3.97832e-18	74.8463
	rs3756784	Galectin-3	G	T	0.1964	0.0234	0.0117	0.0450599	4
	rs3764625	Galectin-3	G	T	0.5814	-0.0092	0.0104	0.3767	0.782544
	rs3766823	Galectin-3	A	G	0.1879	-0.0035	0.012	0.768	0.0850694
	rs3784710	Galectin-3	C	T	0.2338	-0.0273	0.0108	0.0115199	6.38966
	rs3802177	Galectin-3	A	G	0.3114	-0.022	0.01	0.02791	4.84
	rs3803286	Galectin-3	G	A	0.663	-0.0174	0.0099	0.0790205	3.08907
	rs3807566	Galectin-3	T	G	0.4277	0.014	0.0096	0.1473	2.12674
	rs3814883	Galectin-3	T	C	0.4654	-0.006	0.0098	0.540201	0.374844
	rs3851998	Galectin-3	G	C	0.7516	0.0073	0.011	0.5066	0.440413
	rs3866805	Galectin-3	A	C	0.3614	0.0067	0.0097	0.4898	0.477096
	rs3897102	Galectin-3	T	C	0.4192	0.0086	0.0098	0.3823	0.770096
	rs3901286	Galectin-3	A	C	0.1595	-0.015	0.0131	0.2512	1.31111
	rs3902951	Galectin-3	G	T	0.2919	0.0054	0.0105	0.608199	0.26449
	rs3935190	Galectin-3	A	G	0.5171	-0.0197	0.0113	0.08085	3.03931
	rs394608	Galectin-3	C	T	0.5348	0.0086	0.01	0.3928	0.7396
	rs396755	Galectin-3	G	C	0.5801	0.0037	0.0095	0.695401	0.15169
	rs40071	Galectin-3	C	T	0.1968	0.0079	0.0115	0.4902	0.471909
	rs4017425	Galectin-3	T	C	0.4632	-0.0016	0.0096	0.8678	0.0277778
	rs4055791	Galectin-3	T	C	0.4157	-0.0044	0.0096	0.6474	0.210069
	rs406388	Galectin-3	G	C	0.1859	-0.0198	0.0126	0.1149	2.46939
	rs41279738	Galectin-3	G	T	0.0386	0.0185	0.028	0.5085	0.436543
	rs41315816	Galectin-3	C	T	0.0556	0.0029	0.0251	0.9083	0.013349
	rs4148155	Galectin-3	G	A	0.1077	-0.0015	0.0147	0.9184	0.0104123
	rs4261944	Galectin-3	G	T	0.3526	0.0107	0.0106	0.3098	1.01896
	rs4284600	Galectin-3	C	T	0.4841	0.0019	0.0096	0.8399	0.039171
	rs429343	Galectin-3	G	A	0.5584	0.0043	0.0095	0.6541	0.204875
	rs429358	Galectin-3	C	T	0.1578	0.025	0.0125	0.0460702	4
	rs4307239	Galectin-3	G	A	0.47	0.001	0.0097	0.916	0.0106281
	rs4419475	Galectin-3	T	A	0.4217	-0.0104	0.0097	0.2836	1.14954
	rs4456769	Galectin-3	T	C	0.3334	0.0043	0.0102	0.672	0.17772
	rs4477562	Galectin-3	T	C	0.1366	-0.0244	0.0129	0.0591902	3.57767
	rs4482463	Galectin-3	A	C	0.9216	-0.0014	0.0167	0.9344	0.00702786
	rs45486197	Galectin-3	A	G	0.0635	0.0128	0.018	0.477	0.505679
	rs4562625	Galectin-3	G	C	0.6122	0.0066	0.0097	0.4979	0.462961
	rs459193	Galectin-3	G	A	0.7396	-0.0163	0.0104	0.1174	2.45645
	rs4605363	Galectin-3	C	A	0.3478	0.003	0.0099	0.764999	0.0918274
	rs4625888	Galectin-3	T	C	0.5356	0.0096	0.0093	0.3024	1.06556
	rs4648450	Galectin-3	A	C	0.4656	0.0078	0.0096	0.4152	0.660156
	rs4658403	Galectin-3	T	C	0.828	0.024	0.0125	0.0537502	3.6864
	rs4672338	Galectin-3	T	C	0.3484	-0.0112	0.0098	0.2552	1.30612
	rs4686471	Galectin-3	C	T	0.6188	-0.0092	0.0099	0.3498	0.863585
	rs4722398	Galectin-3	T	C	0.1237	-0.0131	0.0138	0.3453	0.901124
	rs4737188	Galectin-3	T	A	0.4872	0.0143	0.0094	0.1266	2.31428
	rs4764949	Galectin-3	G	A	0.3368	0.0057	0.0098	0.559099	0.338297
	rs4790292	Galectin-3	A	C	0.1584	0.0041	0.0138	0.766999	0.0882693
	rs4810426	Galectin-3	T	C	0.1267	-0.0124	0.0137	0.3662	0.819223
	rs4820410	Galectin-3	G	A	0.3477	0.0041	0.0099	0.6826	0.171513
	rs4823182	Galectin-3	G	A	0.3586	0.0055	0.0099	0.5797	0.308642
	rs4832298	Galectin-3	T	C	0.7112	0.0074	0.0104	0.4765	0.506287
	rs4858940	Galectin-3	C	T	0.8967	-0.0095	0.0144	0.509	0.435233
	rs4865796	Galectin-3	A	G	0.6915	0.0011	0.0102	0.9136	0.0116301
	rs4876611	Galectin-3	G	A	0.723	0.0307	0.0104	0.00302698	8.71385
	rs4929923	Galectin-3	C	T	0.6305	-0.0065	0.0097	0.4978	0.449038
	rs5011579	Galectin-3	G	C	0.6951	0.0079	0.0105	0.4546	0.566077
	rs512121	Galectin-3	C	T	0.2012	-0.0123	0.0118	0.2978	1.08654
	rs516946	Galectin-3	C	T	0.7675	0.0097	0.011	0.3778	0.777603
	rs5215	Galectin-3	T	C	0.6165	0.0019	0.0096	0.8444	0.039171
	rs529200	Galectin-3	G	A	0.5509	-0.0141	0.0099	0.1551	2.02847
	rs539515	Galectin-3	C	A	0.1942	0.0185	0.0116	0.1123	2.54348
	rs55707359	Galectin-3	G	T	0.0132	0.0332	0.0512	0.516699	0.420471
	rs55714539	Galectin-3	C	A	0.3526	-0.0122	0.0102	0.2297	1.4306
	rs55726687	Galectin-3	A	G	0.212	0.0094	0.0114	0.4135	0.679902
	rs55769038	Galectin-3	A	G	0.5679	-0.0116	0.0099	0.2404	1.37292
	rs557951	Galectin-3	G	T	0.3114	0.0141	0.01	0.1585	1.9881
	rs558887	Galectin-3	G	A	0.2999	0.0154	0.0105	0.1414	2.15111
	rs559231	Galectin-3	T	G	0.4005	-0.0189	0.0099	0.0565497	3.64463
	rs56038322	Galectin-3	A	G	0.305	0.0199	0.0107	0.0630202	3.4589
	rs56133507	Galectin-3	G	T	0.1863	0.0111	0.0122	0.3626	0.827802
	rs56143236	Galectin-3	T	C	0.2419	-0.0149	0.0108	0.1695	1.90338
	rs56161855	Galectin-3	T	A	0.1448	0.0178	0.0128	0.1654	1.93384
	rs56203622	Galectin-3	C	T	0.1508	0.0236	0.0131	0.0715402	3.2455
	rs56352336	Galectin-3	C	T	0.1429	-0.0042	0.013	0.745	0.104379
	rs56399737	Galectin-3	T	C	0.4415	-0.0008	0.0095	0.9326	0.00709141
	rs56858768	Galectin-3	A	G	0.2946	0.0084	0.0107	0.4288	0.616298
	rs56893062	Galectin-3	G	T	0.3223	0.0044	0.0108	0.6857	0.165981
	rs56930105	Galectin-3	T	C	0.1367	-0.0126	0.0137	0.3575	0.845863
	rs57636386	Galectin-3	C	T	0.0904	-0.0062	0.0153	0.685199	0.16421
	rs576674	Galectin-3	A	G	0.8394	-0.027	0.0122	0.0265302	4.89788
	rs57989773	Galectin-3	C	T	0.2366	-0.0115	0.0119	0.3309	0.933903
	rs58862095	Galectin-3	T	C	0.4289	-0.0012	0.0097	0.9039	0.0153045
	rs59068084	Galectin-3	T	G	0.4073	0.0226	0.0107	0.0342997	4.46118
	rs59227842	Galectin-3	G	A	0.3025	-0.016	0.0102	0.1171	2.46059
	rs59379014	Galectin-3	T	C	0.0771	0.1345	0.0159	2.64119e-17	71.5567
	rs594024	Galectin-3	C	T	0.5204	-0.004	0.0097	0.6774	0.17005
	rs6023655	Galectin-3	G	A	0.7708	-0.0243	0.012	0.04341	4.10062
	rs6059662	Galectin-3	G	A	0.6964	0.0136	0.0104	0.1901	1.71006
	rs6066138	Galectin-3	A	G	0.2626	0.0111	0.0108	0.3062	1.05633
	rs60764613	Galectin-3	T	G	0.1518	0.0028	0.0129	0.8307	0.0471126
	rs61740466	Galectin-3	A	G	0.2469	0.0156	0.0109	0.154	2.04831
	rs61813324	Galectin-3	T	C	0.1393	-0.0119	0.0136	0.3823	0.765625
	rs61828641	Galectin-3	A	G	0.1089	-0.0087	0.0142	0.542099	0.375372
	rs61871615	Galectin-3	T	C	0.0849	-0.0008	0.0175	0.9659	0.0020898
	rs61903695	Galectin-3	G	A	0.2511	0.0067	0.0115	0.555801	0.339433
	rs61953351	Galectin-3	T	G	0.2549	-0.0413	0.0106	9.48593e-05	15.1806
	rs61992671	Galectin-3	G	A	0.4575	-0.0236	0.0115	0.0394603	4.21142
	rs62007782	Galectin-3	A	G	0.2542	0.0037	0.0113	0.745101	0.107213
	rs62020775	Galectin-3	A	T	0.1404	-0.0145	0.0142	0.306	1.0427
	rs62072006	Galectin-3	C	A	0.1457	-0.0111	0.014	0.4266	0.628622
	rs62107261	Galectin-3	C	T	0.0507	-0.0476	0.0291	0.1017	2.67564
	rs62143199	Galectin-3	T	C	0.4922	0.2026	0.0183	2.23924e-28	122.568
	rs62176243	Galectin-3	T	A	0.2688	-0.0011	0.0112	0.9186	0.00964605
	rs62190049	Galectin-3	C	G	0.3807	-0.0007	0.01	0.9425	0.0049
	rs622217	Galectin-3	C	T	0.4876	-0.0053	0.0094	0.5752	0.317904
	rs62241847	Galectin-3	G	A	0.3131	-0.0049	0.0103	0.6376	0.226317
	rs62246311	Galectin-3	A	G	0.1	-0.0024	0.0152	0.8771	0.0249307
	rs62379271	Galectin-3	G	T	0.5595	0.0022	0.0104	0.8337	0.0447485
	rs6265	Galectin-3	T	C	0.1885	-0.0096	0.0116	0.4081	0.684899
	rs6430068	Galectin-3	A	G	0.1126	0.0028	0.0147	0.847	0.0362812
	rs6444950	Galectin-3	A	G	0.2318	-0.0001	0.0109	0.9912	8.4168e-05
	rs6474856	Galectin-3	T	C	0.6661	-0.0033	0.0103	0.745501	0.102649
	rs6494307	Galectin-3	G	C	0.4387	-0.0096	0.0094	0.3082	1.04301
	rs6515236	Galectin-3	C	A	0.262	0.0076	0.0106	0.4711	0.514062
	rs6531639	Galectin-3	A	G	0.2348	-0.0139	0.0126	0.2701	1.21699
	rs6545714	Galectin-3	A	G	0.6101	0.0066	0.0096	0.490999	0.472656
	rs6560906	Galectin-3	C	T	0.6889	-0.0022	0.0107	0.837	0.0422744
	rs6561937	Galectin-3	A	T	0.7581	0.0031	0.0111	0.7791	0.0779969
	rs6567160	Galectin-3	C	T	0.2339	-0.0107	0.011	0.3299	0.946198
	rs6572978	Galectin-3	T	C	0.5482	-0.0647	0.0094	6.51178e-12	47.3754
	rs6575340	Galectin-3	A	G	0.6317	0.0038	0.0104	0.713199	0.133506
	rs6597975	Galectin-3	G	C	0.5386	-0.015	0.0099	0.1296	2.29568
	rs66679256	Galectin-3	T	C	0.4491	0.0023	0.0102	0.8201	0.0508458
	rs6669189	Galectin-3	T	C	0.4068	0.0064	0.0095	0.5013	0.45385
	rs6669341	Galectin-3	G	A	0.591	-0.011	0.0095	0.2498	1.34072
	rs6682438	Galectin-3	C	T	0.6661	0.0011	0.0107	0.9172	0.0105686
	rs6696828	Galectin-3	C	G	0.293	-0.0054	0.0106	0.6153	0.259523
	rs6705567	Galectin-3	C	T	0.3672	0.0064	0.0098	0.5161	0.426489
	rs6707827	Galectin-3	G	A	0.7085	-0.0078	0.0113	0.4855	0.476466
	rs6710091	Galectin-3	G	C	0.3539	-0.0154	0.0099	0.1187	2.41975
	rs6713781	Galectin-3	C	G	0.4197	-0.0246	0.0099	0.01293	6.17447
	rs67232546	Galectin-3	T	C	0.2071	0.0022	0.0117	0.8496	0.0353569
	rs6725931	Galectin-3	T	C	0.8648	-0.01	0.0138	0.4705	0.5251
	rs6744646	Galectin-3	G	A	0.8235	0.014	0.0119	0.2365	1.38408
	rs6752979	Galectin-3	A	G	0.3184	0.0038	0.0103	0.715501	0.136111
	rs6774894	Galectin-3	A	T	0.359	-0.002	0.0115	0.864	0.0302457
	rs6795735	Galectin-3	T	C	0.4231	0.0385	0.0095	4.66896e-05	16.4238
	rs6831088	Galectin-3	A	G	0.653	0.0056	0.0108	0.605399	0.268861
	rs6843852	Galectin-3	T	C	0.5333	-0.0062	0.0102	0.5419	0.369473
	rs6878122	Galectin-3	A	G	0.7135	0.012	0.0104	0.2484	1.33136
	rs6909685	Galectin-3	T	C	0.3422	-0.01	0.0105	0.3413	0.907029
	rs6922607	Galectin-3	G	A	0.1918	0.0341	0.0116	0.003155	8.64157
	rs6938973	Galectin-3	C	T	0.6242	-0.0055	0.0099	0.579301	0.308642
	rs6950388	Galectin-3	A	G	0.778	0.0118	0.0124	0.3439	0.905567
	rs6962980	Galectin-3	C	A	0.5412	-0.0048	0.0112	0.668399	0.183673
	rs698147	Galectin-3	G	A	0.5357	0.0058	0.0098	0.557799	0.350271
	rs6998660	Galectin-3	G	A	0.4402	0.0009	0.0095	0.921	0.00897507
	rs7024334	Galectin-3	G	T	0.767	-0.0082	0.0109	0.449	0.565946
	rs7027304	Galectin-3	T	C	0.656	-0.0011	0.0102	0.9125	0.0116301
	rs7034554	Galectin-3	G	A	0.3501	-0.0118	0.0101	0.2411	1.36496
	rs7038943	Galectin-3	C	T	0.37	-0.0057	0.0096	0.555699	0.352539
	rs704061	Galectin-3	C	T	0.4329	0.0001	0.0096	0.9949	0.000108507
	rs705145	Galectin-3	A	C	0.3532	0.0076	0.0101	0.4559	0.566219
	rs7070670	Galectin-3	T	C	0.3144	0.0141	0.0103	0.1739	1.87397
	rs7081254	Galectin-3	C	T	0.1893	-0.0149	0.0126	0.235	1.3984
	rs7124681	Galectin-3	A	C	0.4035	-0.0009	0.0097	0.9239	0.00860878
	rs7132908	Galectin-3	A	G	0.3942	-0.0017	0.0096	0.8629	0.0313585
	rs7138300	Galectin-3	T	C	0.5566	0.006	0.0094	0.5219	0.407424
	rs7144011	Galectin-3	T	G	0.2161	-0.0021	0.0112	0.8528	0.0351562
	rs71495038	Galectin-3	A	G	0.0807	0.0022	0.016	0.8921	0.0189062
	rs7177055	Galectin-3	A	G	0.7053	0.0051	0.0101	0.6163	0.254975
	rs7185735	Galectin-3	G	A	0.4084	-0.0087	0.0095	0.3609	0.83867
	rs7201895	Galectin-3	A	G	0.3449	0.0142	0.0101	0.1594	1.97667
	rs7206608	Galectin-3	G	C	0.3109	0.0069	0.0103	0.506499	0.44877
	rs7218014	Galectin-3	C	T	0.2202	0.0027	0.0116	0.8171	0.0541766
	rs7232171	Galectin-3	T	G	0.5933	0.0029	0.01	0.772601	0.0841
	rs723672	Galectin-3	T	C	0.4376	0.0125	0.0096	0.1963	1.69542
	rs7240767	Galectin-3	C	T	0.3885	0.0019	0.0102	0.8494	0.0346982
	rs7259070	Galectin-3	C	T	0.595	0.0092	0.0109	0.3973	0.712398
	rs72634826	Galectin-3	A	G	0.2549	-0.0083	0.0138	0.545801	0.361741
	rs72649373	Galectin-3	C	T	0.1485	0.0104	0.014	0.4582	0.551837
	rs72673947	Galectin-3	G	A	0.1123	-0.0172	0.0138	0.2112	1.55346
	rs72892910	Galectin-3	T	G	0.1845	-0.0017	0.0117	0.8849	0.0211118
	rs72976986	Galectin-3	A	G	0.1827	-0.0034	0.0131	0.7958	0.067362
	rs73026725	Galectin-3	A	C	0.1474	0.0091	0.0136	0.5053	0.447718
	rs73052033	Galectin-3	C	T	0.1771	0.0006	0.012	0.9591	0.0025
	rs7306534	Galectin-3	A	G	0.6365	-0.0018	0.0106	0.8661	0.0288359
	rs73124396	Galectin-3	C	T	0.2108	-0.009	0.0116	0.4396	0.601962
	rs73142879	Galectin-3	T	C	0.1787	-0.0158	0.0119	0.1843	1.76287
	rs73193736	Galectin-3	G	A	0.2343	0.0115	0.0111	0.3021	1.07337
	rs73213484	Galectin-3	T	A	0.1508	0.0185	0.0136	0.1726	1.8504
	rs7331420	Galectin-3	A	G	0.2984	0.0005	0.011	0.9609	0.00206612
	rs7357754	Galectin-3	G	A	0.4967	-0.0178	0.0097	0.0663193	3.36741
	rs735949	Galectin-3	C	T	0.1385	-0.0112	0.0138	0.4184	0.658685
	rs73601548	Galectin-3	T	C	0.1164	0.007	0.0142	0.6193	0.243007
	rs73985439	Galectin-3	C	A	0.3037	0.0084	0.0105	0.4219	0.64
	rs7442885	Galectin-3	G	C	0.2183	0.0042	0.0111	0.7052	0.14317
	rs745249	Galectin-3	T	C	0.2971	0.0009	0.0104	0.9301	0.00748891
	rs74750282	Galectin-3	C	T	0.0859	0.0137	0.0157	0.3859	0.761451
	rs7498665	Galectin-3	G	A	0.3979	-0.0012	0.0097	0.9016	0.0153045
	rs7516554	Galectin-3	T	C	0.3954	0.0037	0.0096	0.702	0.148546
	rs7519259	Galectin-3	A	G	0.5285	-0.004	0.0097	0.6773	0.17005
	rs753270	Galectin-3	C	T	0.5845	-0.0033	0.0096	0.732399	0.118164
	rs754635	Galectin-3	G	C	0.8731	0.0085	0.0137	0.536	0.384943
	rs75499503	Galectin-3	T	C	0.2435	-0.0072	0.0112	0.518	0.413265
	rs7561798	Galectin-3	G	A	0.4811	0.0093	0.0095	0.3267	0.958338
	rs7568228	Galectin-3	C	G	0.5097	-0.0074	0.0102	0.4716	0.526336
	rs7571496	Galectin-3	G	A	0.2919	0.0034	0.0106	0.7487	0.102884
	rs7572970	Galectin-3	G	A	0.734	0.0099	0.0105	0.3439	0.88898
	rs76183894	Galectin-3	C	T	0.0845	0.0051	0.0158	0.7472	0.10419
	rs7619041	Galectin-3	A	T	0.5043	-0.0106	0.0096	0.2685	1.21918
	rs7619139	Galectin-3	A	T	0.5963	-0.001	0.0098	0.9184	0.0104123
	rs76267866	Galectin-3	T	A	0.2128	0.018	0.0113	0.1106	2.5374
	rs7651090	Galectin-3	G	A	0.3072	-0.0066	0.0101	0.513701	0.427017
	rs765874	Galectin-3	A	T	0.4861	0.003	0.0096	0.752801	0.0976562
	rs76702514	Galectin-3	G	C	0.225	0.0024	0.0121	0.8416	0.0393416
	rs7674212	Galectin-3	T	G	0.4249	0.0012	0.0097	0.9008	0.0153045
	rs7683836	Galectin-3	A	G	0.5317	0.0001	0.0103	0.9897	9.42596e-05
	rs7685296	Galectin-3	T	C	0.2796	-0.0009	0.0113	0.9372	0.00634349
	rs7704382	Galectin-3	G	C	0.455	-0.0104	0.0094	0.2715	1.22408
	rs7708584	Galectin-3	G	A	0.57	-0.0098	0.0094	0.2952	1.08692
	rs77258096	Galectin-3	A	C	0.0967	-0.0073	0.0145	0.6138	0.25346
	rs7729395	Galectin-3	T	C	0.0522	-0.0226	0.0186	0.2254	1.47636
	rs7756992	Galectin-3	G	A	0.2835	-0.0102	0.0102	0.3192	1
	rs7761673	Galectin-3	A	T	0.2024	0.0138	0.0124	0.266	1.23855
	rs7762794	Galectin-3	G	A	0.308	0.0009	0.01	0.9282	0.0081
	rs7774	Galectin-3	A	C	0.3331	-0.0176	0.0104	0.0900596	2.86391
	rs7776021	Galectin-3	A	G	0.2906	-0.0083	0.011	0.4496	0.569339
	rs7786095	Galectin-3	G	A	0.0977	-0.0008	0.0149	0.9575	0.00288275
	rs780094	Galectin-3	C	T	0.6167	-0.0447	0.0095	2.74897e-06	22.1395
	rs78012460	Galectin-3	G	A	0.023	-0.0045	0.0378	0.906	0.0141723
	rs7802342	Galectin-3	G	T	0.2918	-0.01	0.0114	0.3804	0.769468
	rs7805441	Galectin-3	T	C	0.5152	0.0141	0.0094	0.1319	2.25
	rs784257	Galectin-3	C	T	0.8238	-0.0098	0.0127	0.4374	0.595449
	rs7845219	Galectin-3	C	T	0.4737	0.0066	0.0095	0.4882	0.482659
	rs78605811	Galectin-3	C	A	0.0562	0.0014	0.0191	0.9411	0.00537266
	rs78886584	Galectin-3	G	A	0.5127	0.0101	0.0129	0.4338	0.613004
	rs7893571	Galectin-3	T	G	0.678	0.0032	0.0107	0.7651	0.0894401
	rs7923866	Galectin-3	T	C	0.3769	-0.021	0.0096	0.0287501	4.78516
	rs7924036	Galectin-3	T	G	0.51	-0.0333	0.0094	0.000406004	12.5497
	rs7925100	Galectin-3	A	G	0.3735	-0.0026	0.0098	0.792399	0.0703873
	rs7929543	Galectin-3	C	A	0.093	0.0208	0.016	0.1927	1.69
	rs7942037	Galectin-3	C	G	0.3407	0.003	0.0103	0.7687	0.0848336
	rs7944782	Galectin-3	G	T	0.512	-0.0141	0.0095	0.1374	2.20288
	rs7947143	Galectin-3	A	G	0.1471	0.0128	0.0128	0.3184	1
	rs7975187	Galectin-3	G	A	0.203	-0.0154	0.0115	0.1829	1.79327
	rs79780963	Galectin-3	T	C	0.2563	0.0023	0.0145	0.8742	0.0251605
	rs7979473	Galectin-3	G	A	0.6025	-0.0963	0.0097	3.71279e-23	98.5619
	rs7996639	Galectin-3	A	G	0.46	0.0008	0.0097	0.9331	0.006802
	rs80135274	Galectin-3	T	A	0.0631	0.0146	0.0169	0.3858	0.746332
	rs8015400	Galectin-3	A	C	0.6704	-0.0079	0.0105	0.4529	0.566077
	rs8020365	Galectin-3	A	T	0.2166	-0.0035	0.0112	0.754899	0.0976562
	rs8022405	Galectin-3	C	T	0.4297	-0.2906	0.0096	2.36048e-201	916.323
	rs8024137	Galectin-3	T	A	0.8689	0.0157	0.0137	0.2514	1.31328
	rs8025516	Galectin-3	G	T	0.6366	-0.0052	0.0098	0.5942	0.281549
	rs8047587	Galectin-3	T	G	0.4501	-0.0107	0.0095	0.2595	1.26859
	rs8063946	Galectin-3	T	C	0.0606	-0.0026	0.0237	0.912	0.0120351
	rs8068804	Galectin-3	A	G	0.3062	0.0183	0.0103	0.0742797	3.15666
	rs8076669	Galectin-3	C	T	0.551	-0.004	0.0094	0.6703	0.181077
	rs8089514	Galectin-3	A	T	0.3552	0.0041	0.0109	0.705399	0.141486
	rs8108269	Galectin-3	G	T	0.3094	-0.0133	0.01	0.1856	1.7689
	rs8112818	Galectin-3	G	A	0.4137	-0.0034	0.0095	0.718899	0.128089
	rs812936	Galectin-3	A	G	0.8036	0.097	0.0124	6.27914e-15	61.1928
	rs8132491	Galectin-3	A	G	0.3097	0.0059	0.0112	0.6019	0.277503
	rs815163	Galectin-3	C	T	0.5645	-0.0158	0.0099	0.1086	2.54709
	rs825476	Galectin-3	T	C	0.5885	0.0053	0.0095	0.5783	0.311247
	rs838134	Galectin-3	C	A	0.292	-0.0612	0.0108	1.217e-08	32.1111
	rs840967	Galectin-3	A	C	0.5814	-0.0002	0.0095	0.9822	0.000443213
	rs849135	Galectin-3	A	G	0.4659	-0.0149	0.0094	0.1126	2.51256
	rs852042	Galectin-3	G	A	0.7434	-0.0017	0.0115	0.8798	0.0218526
	rs853974	Galectin-3	C	T	0.7335	-0.0086	0.0104	0.4111	0.683802
	rs862320	Galectin-3	T	C	0.4218	0.0127	0.0099	0.1991	1.64565
	rs879620	Galectin-3	T	C	0.5984	-0.0091	0.0107	0.3952	0.723295
	rs909892	Galectin-3	A	G	0.135	0.0118	0.0135	0.3814	0.764005
	rs923994	Galectin-3	G	A	0.7822	0.0108	0.0113	0.3397	0.913462
	rs9291822	Galectin-3	T	C	0.5322	-0.0003	0.0095	0.9744	0.00099723
	rs9294260	Galectin-3	A	G	0.4739	0.0145	0.0094	0.1219	2.37947
	rs9349235	Galectin-3	T	C	0.4227	-0.0021	0.0104	0.8392	0.0407729
	rs935166	Galectin-3	A	G	0.5002	0.0214	0.0096	0.0260699	4.96918
	rs9366863	Galectin-3	C	T	0.6633	-0.0089	0.0099	0.3673	0.808183
	rs9369425	Galectin-3	A	G	0.7225	0.0078	0.0111	0.4802	0.493791
	rs9388446	Galectin-3	A	T	0.5009	0.0117	0.0095	0.2181	1.51679
	rs9461887	Galectin-3	T	C	0.2478	-0.0091	0.0107	0.3967	0.723295
	rs9463175	Galectin-3	T	C	0.3553	-0.0193	0.01	0.0527096	3.7249
	rs9478496	Galectin-3	C	T	0.1746	0.0041	0.012	0.735201	0.116736
	rs9515446	Galectin-3	G	A	0.4485	0.0093	0.0096	0.3296	0.938477
	rs9522180	Galectin-3	T	C	0.5366	0.0132	0.0106	0.21	1.55073
	rs9571687	Galectin-3	A	C	0.3158	-0.0037	0.01	0.7082	0.1369
	rs961498	Galectin-3	C	G	0.5146	0.0112	0.0106	0.2891	1.11641
	rs963740	Galectin-3	T	A	0.2856	0.0097	0.0102	0.3423	0.904364
	rs9638713	Galectin-3	G	A	0.9773	-0.028	0.0358	0.435	0.611716
	rs9673839	Galectin-3	G	A	0.4804	0.0186	0.0099	0.0594306	3.52984
	rs9674487	Galectin-3	T	C	0.1684	0.0013	0.0177	0.9396	0.00539436
	rs982077	Galectin-3	G	A	0.5337	0.004	0.0094	0.673	0.181077
	rs9830592	Galectin-3	A	C	0.5838	0.0105	0.0099	0.2881	1.12489
	rs9839081	Galectin-3	A	G	0.3333	-0.0151	0.0103	0.1429	2.14921
	rs9843653	Galectin-3	C	T	0.4747	0.0143	0.0094	0.1284	2.31428
	rs9844972	Galectin-3	C	G	0.0648	0.0094	0.017	0.5818	0.305744
	rs9876664	Galectin-3	T	G	0.403	0.0012	0.0095	0.9011	0.0159557
	rs9888533	Galectin-3	T	C	0.5361	-0.0111	0.011	0.3129	1.01826
	rs9894220	Galectin-3	G	A	0.4195	-0.0022	0.0095	0.8192	0.0536288
	rs9926784	Galectin-3	C	T	0.1761	0.0123	0.012	0.3043	1.05062
	rs9931586	Galectin-3	G	C	0.2661	-0.005	0.0119	0.6743	0.176541
	rs993380	Galectin-3	G	A	0.6537	-0.0021	0.0105	0.8424	0.04
	rs9940149	Galectin-3	A	G	0.177	0.0093	0.0119	0.4305	0.610762
	rs9951619	Galectin-3	G	T	0.7565	-0.0089	0.0108	0.407	0.679098
	rs10063055	T2DM	T	C	0.251841	0.0025	0.009	0.778999	0.0771605
	rs10077431	T2DM	A	C	0.214668	-0.0487	0.0089	4.75499e-08	29.9418
	rs10087241	T2DM	A	G	0.594893	-0.0475	0.008	2.79602e-09	35.2539
	rs10100265	T2DM	C	A	0.61049	-0.0491	0.0079	6.28796e-10	38.6286
	rs10114341	T2DM	C	T	0.440754	-0.0409	0.0072	1.15101e-08	32.2687
	rs10160769	T2DM	C	G	0.214929	-0.0361	0.0097	0.000188599	13.8507
	rs10172483	T2DM	T	A	0.234307	-0.0029	0.0093	0.7583	0.0972367
	rs10182416	T2DM	G	A	0.511854	0.0082	0.0078	0.2921	1.10519
	rs10184537	T2DM	T	C	0.340477	-0.0118	0.0083	0.1545	2.02119
	rs10401969	T2DM	C	T	0.0765858	0.0921	0.0133	4.13143e-12	47.953
	rs10402950	T2DM	C	T	0.289116	-0.0107	0.0087	0.2196	1.51262
	rs1050226	T2DM	G	A	0.406792	-0.0491	0.0074	3.34195e-11	44.025
	rs10505836	T2DM	C	A	0.860918	0.02	0.0104	0.0535205	3.69822
	rs10510025	T2DM	T	C	0.246269	0.0195	0.0091	0.0312601	4.59184
	rs1061813	T2DM	A	G	0.537119	-0.0429	0.0073	3.37202e-09	34.5357
	rs1063355	T2DM	G	T	0.602436	0.0709	0.0079	3.71535e-19	80.5449
	rs1064213	T2DM	A	G	0.480617	0.02	0.0079	0.0109401	6.40923
	rs10740322	T2DM	A	G	0.687104	0.0477	0.0085	2.10902e-08	31.4919
	rs10742752	T2DM	C	T	0.612361	0.0134	0.0073	0.0673008	3.36949
	rs10771041	T2DM	T	C	0.114845	0.0197	0.0122	0.1062	2.60743
	rs10780248	T2DM	A	G	0.559224	-0.0299	0.0079	0.000143301	14.3248
	rs10799778	T2DM	G	T	0.834503	-0.0123	0.0105	0.24	1.37224
	rs10811661	T2DM	C	T	0.173605	-0.1569	0.0098	4.13238e-58	256.327
	rs10830963	T2DM	G	C	0.275768	0.0909	0.008	5.84655e-30	129.106
	rs10832778	T2DM	G	C	0.620075	-0.0615	0.0074	7.92501e-17	69.0696
	rs10842994	T2DM	T	C	0.197025	-0.0755	0.0091	1.01508e-16	68.8353
	rs10887578	T2DM	C	G	0.498729	0.0336	0.0078	1.70098e-05	18.5562
	rs10927006	T2DM	C	T	0.144762	-0.0184	0.0111	0.0982992	2.74783
	rs10960293	T2DM	T	G	0.332289	-0.0091	0.0083	0.2768	1.20206
	rs10974438	T2DM	C	A	0.351215	0.0591	0.0075	3.01301e-15	62.0944
	rs10989067	T2DM	A	G	0.317315	0.0143	0.0084	0.089419	2.8981
	rs11001963	T2DM	T	C	0.578597	0.0186	0.0082	0.02339	5.14515
	rs11009685	T2DM	T	C	0.241552	-0.0061	0.009	0.497	0.459383
	rs11012732	T2DM	G	A	0.3313	-0.0022	0.0083	0.7897	0.0702569
	rs11057072	T2DM	G	A	0.231595	0.0178	0.0092	0.0539299	3.74338
	rs11079849	T2DM	T	C	0.325695	-0.052	0.0084	7.25905e-10	38.322
	rs11098676	T2DM	C	T	0.787639	0.054	0.0096	2.02698e-08	31.6406
	rs11099020	T2DM	T	C	0.642464	-0.0108	0.0079	0.1678	1.86893
	rs11107116	T2DM	T	G	0.219714	0.0467	0.0085	3.74999e-08	30.1853
	rs11115160	T2DM	A	G	0.236602	-0.0248	0.0093	0.00757094	7.11111
	rs11122450	T2DM	G	T	0.612587	-0.0101	0.0079	0.1996	1.63451
	rs11134679	T2DM	G	A	0.684876	0.02	0.0084	0.0171601	5.66893
	rs11150745	T2DM	G	A	0.317466	-0.0362	0.0085	1.854e-05	18.1376
	rs111598585	T2DM	T	C	0.207956	-0.015	0.0097	0.1221	2.39133
	rs11161044	T2DM	C	G	0.806743	0.032	0.01	0.00131701	10.24
	rs11165643	T2DM	T	C	0.588631	0.0239	0.0073	0.00109199	10.7189
	rs111689389	T2DM	C	G	0.282149	-0.0241	0.0087	0.00581996	7.67354
	rs11218510	T2DM	A	G	0.399972	-0.0107	0.008	0.1813	1.78891
	rs11250094	T2DM	C	G	0.547124	-0.0376	0.0084	7.491e-06	20.0363
	rs11257655	T2DM	T	C	0.206773	0.0737	0.0087	1.96607e-17	71.7623
	rs1127655	T2DM	T	C	0.529064	-0.0438	0.0079	2.47098e-08	30.7393
	rs113079574	T2DM	T	C	0.192106	-0.0174	0.01	0.0817692	3.0276
	rs113603865	T2DM	T	C	0.210736	0.0554	0.0095	5.89495e-09	34.0073
	rs113624107	T2DM	A	G	0.225922	0.0162	0.0093	0.0833393	3.03434
	rs11525873	T2DM	C	T	0.0972268	0.0106	0.0132	0.4197	0.644858
	rs11607476	T2DM	C	A	0.486995	0.0266	0.0079	0.000767591	11.3373
	rs11610621	T2DM	A	T	0.147531	0.0206	0.0109	0.0578695	3.57175
	rs11630647	T2DM	A	G	0.252457	-0.0262	0.0089	0.00333803	8.66608
	rs11634851	T2DM	G	C	0.466303	0.02	0.0079	0.0111099	6.40923
	rs11656076	T2DM	A	G	0.226113	-0.0162	0.0093	0.0791298	3.03434
	rs1167311	T2DM	A	G	0.683163	-0.0071	0.0089	0.4241	0.63641
	rs11691869	T2DM	A	C	0.359979	-0.0198	0.0082	0.0156899	5.83046
	rs11708067	T2DM	G	A	0.23899	-0.0965	0.0086	5.93335e-29	125.909
	rs11709402	T2DM	G	A	0.275661	0.0337	0.0088	0.000125901	14.6654
	rs11757278	T2DM	C	T	0.305551	-0.0185	0.0084	0.02784	4.85048
	rs11778219	T2DM	G	A	0.163386	0.0125	0.0104	0.2321	1.44462
	rs118136827	T2DM	T	G	0.28137	-0.0011	0.0087	0.8999	0.0159863
	rs1191600	T2DM	A	C	0.595816	-0.0157	0.008	0.0500299	3.85141
	rs11919665	T2DM	T	A	0.679497	0.0134	0.0084	0.1109	2.54478
	rs11925227	T2DM	A	G	0.183439	-0.0534	0.0095	2.24999e-08	31.5962
	rs11926707	T2DM	C	T	0.625556	0.0463	0.0082	1.68601e-08	31.8812
	rs12072739	T2DM	G	A	0.224302	0.0276	0.0093	0.00311997	8.80749
	rs12088739	T2DM	G	A	0.0898481	-0.0884	0.013	9.79264e-12	46.24
	rs12089815	T2DM	A	G	0.548416	-0.006	0.0079	0.450199	0.576831
	rs12101393	T2DM	G	C	0.215677	-0.0284	0.0096	0.00309799	8.75174
	rs12149660	T2DM	A	G	0.11429	-0.0113	0.0124	0.3644	0.83045
	rs12259464	T2DM	A	G	0.484207	0.0046	0.0079	0.5624	0.339048
	rs12273545	T2DM	T	C	0.0558328	0.0125	0.017	0.4639	0.540657
	rs12299509	T2DM	G	A	0.478622	0.0467	0.0073	2.08699e-10	40.9249
	rs12340969	T2DM	T	C	0.441484	-0.0193	0.0079	0.0146299	5.96843
	rs12364470	T2DM	G	T	0.164503	0.0301	0.0096	0.00170498	9.83084
	rs12440603	T2DM	T	C	0.432545	0.0167	0.0079	0.0342602	4.46867
	rs12462975	T2DM	A	G	0.328091	0.0191	0.0084	0.0227997	5.17021
	rs12507026	T2DM	T	A	0.434352	0.0289	0.0078	0.000201999	13.728
	rs12541408	T2DM	C	T	0.318481	0.0079	0.0083	0.339	0.905937
	rs12617659	T2DM	T	C	0.147238	-0.0685	0.0103	2.82683e-11	44.229
	rs1263629	T2DM	G	A	0.141776	0.0198	0.0112	0.0769609	3.12532
	rs1266874	T2DM	G	A	0.35031	0.0125	0.0082	0.1302	2.32377
	rs12681792	T2DM	A	C	0.191181	0.0181	0.01	0.0691099	3.2761
	rs12692596	T2DM	T	C	0.36803	0.0426	0.0074	9.88508e-09	33.1402
	rs12696039	T2DM	G	A	0.149159	-0.0358	0.0111	0.001238	10.4021
	rs12712767	T2DM	A	G	0.36879	0.0201	0.0081	0.0132401	6.15775
	rs1286058	T2DM	A	T	0.704482	-0.0288	0.009	0.00133601	10.24
	rs12881629	T2DM	G	A	0.0780179	0.0527	0.0147	0.000347696	12.8525
	rs12910825	T2DM	G	A	0.360391	0.0517	0.0074	2.16421e-12	48.811
	rs12921986	T2DM	G	A	0.0770598	0.0269	0.0135	0.0461998	3.97043
	rs12937411	T2DM	T	C	0.408645	-0.0162	0.008	0.0426501	4.10062
	rs12945601	T2DM	C	T	0.613603	-0.048	0.008	1.71799e-09	36
	rs1296328	T2DM	C	A	0.559261	-0.0412	0.0079	1.98299e-07	27.1982
	rs12970134	T2DM	A	G	0.26512	0.0555	0.008	5.30884e-12	48.1289
	rs13012070	T2DM	A	G	0.227223	-0.0043	0.0085	0.612099	0.255917
	rs13033310	T2DM	A	G	0.251167	0.0107	0.009	0.2362	1.41346
	rs13097918	T2DM	A	T	0.212411	0.0278	0.0095	0.00348401	8.56332
	rs13176429	T2DM	C	T	0.687211	0.0134	0.0085	0.1138	2.48526
	rs13218383	T2DM	G	C	0.337044	-0.0107	0.0082	0.1904	1.70271
	rs1322842	T2DM	G	A	0.610183	0.0011	0.0079	0.8911	0.0193879
	rs13234269	T2DM	A	T	0.492515	-0.0583	0.0078	6.9775e-14	55.866
	rs13239186	T2DM	T	C	0.302029	0.0539	0.0085	2.70402e-10	40.2105
	rs13248187	T2DM	C	T	0.266751	0.0093	0.0089	0.2923	1.09191
	rs1327259	T2DM	G	A	0.388349	-0.0234	0.0081	0.00372598	8.34568
	rs13291723	T2DM	A	G	0.571696	0.0075	0.0079	0.346	0.901298
	rs1333039	T2DM	C	G	0.598788	0.0534	0.0074	5.64157e-13	52.0738
	rs13330951	T2DM	G	A	0.488314	-0.0456	0.0081	1.53801e-08	31.6927
	rs13389219	T2DM	T	C	0.394368	-0.0722	0.0074	2.1062e-22	95.1943
	rs13427822	T2DM	G	A	0.269268	-0.0029	0.0089	0.7484	0.106173
	rs1346841	T2DM	A	G	0.403333	-0.0055	0.008	0.4956	0.472656
	rs1359790	T2DM	A	G	0.2867	-0.0796	0.008	2.79512e-23	99.0025
	rs1360201	T2DM	T	C	0.481875	0.0179	0.0078	0.0225299	5.26644
	rs1411432	T2DM	C	A	0.183679	0.0257	0.0101	0.0108201	6.47476
	rs1438945	T2DM	A	T	0.715356	-0.0177	0.0087	0.0413105	4.13912
	rs1451963	T2DM	T	G	0.0813168	0.0413	0.0142	0.00367697	8.45909
	rs1454687	T2DM	G	C	0.516303	-0.0333	0.0078	2.031e-05	18.2263
	rs1458156	T2DM	T	C	0.488314	0.0169	0.0078	0.0300898	4.69444
	rs1471093	T2DM	A	G	0.618056	0.0119	0.0081	0.1419	2.15836
	rs1477290	T2DM	C	T	0.134269	0.0452	0.0114	7.37106e-05	15.7205
	rs1496653	T2DM	G	A	0.204782	-0.0769	0.0088	2.57217e-18	76.3638
	rs1503526	T2DM	C	T	0.479894	0.0191	0.0078	0.0147001	5.99622
	rs1552224	T2DM	C	A	0.15421	-0.1034	0.0101	8.63575e-25	104.809
	rs156201	T2DM	C	G	0.753464	0.0068	0.0091	0.455	0.558387
	rs1582931	T2DM	A	G	0.472563	-0.0125	0.0078	0.1071	2.56821
	rs1608113	T2DM	T	A	0.365776	-0.0028	0.0081	0.7322	0.119494
	rs1609010	T2DM	G	A	0.566745	0.0165	0.0083	0.0471802	3.95195
	rs16965658	T2DM	G	A	0.0597476	-0.0423	0.0167	0.0113999	6.41576
	rs16988333	T2DM	G	A	0.0904035	-0.0745	0.013	9.16896e-09	32.8417
	rs17056301	T2DM	C	T	0.256899	-0.0041	0.009	0.648	0.207531
	rs17086692	T2DM	T	G	0.313426	-0.0467	0.0084	2.48102e-08	30.9083
	rs17132130	T2DM	C	G	0.222621	-0.0485	0.0095	3.09101e-07	26.0637
	rs17168486	T2DM	T	C	0.173603	0.0742	0.0094	2.17721e-15	62.3092
	rs17289010	T2DM	G	A	0.327595	-0.0157	0.0084	0.0606904	3.49334
	rs17334919	T2DM	T	C	0.100218	-0.1398	0.0128	6.68652e-28	119.287
	rs17399739	T2DM	G	A	0.0683643	0.0114	0.0154	0.4574	0.547984
	rs17405722	T2DM	A	G	0.0741526	0.087	0.0146	2.27798e-09	35.5085
	rs17411031	T2DM	G	C	0.261729	-0.045	0.0081	3.03501e-08	30.8642
	rs17446299	T2DM	G	C	0.163667	0.005	0.0106	0.6382	0.222499
	rs17544384	T2DM	C	T	0.210556	0.0273	0.0096	0.00424903	8.08691
	rs1758632	T2DM	G	C	0.623407	0.0491	0.0081	1.36e-09	36.7446
	rs17631783	T2DM	T	C	0.26346	-0.0487	0.0089	3.94903e-08	29.9418
	rs17668356	T2DM	G	C	0.145801	-0.0024	0.0111	0.8262	0.0467495
	rs17770336	T2DM	T	C	0.322563	0.0347	0.0082	2.31499e-05	17.9073
	rs17791483	T2DM	G	A	0.0625883	-0.102	0.0147	3.41901e-12	48.1466
	rs1788808	T2DM	G	A	0.494999	-0.0325	0.0079	3.578e-05	16.9244
	rs1793636	T2DM	C	G	0.307536	-0.0111	0.0085	0.1914	1.70533
	rs1801214	T2DM	T	C	0.599585	0.0903	0.0074	5.51569e-34	148.906
	rs1805123	T2DM	G	T	0.245155	-0.0257	0.0091	0.00467003	7.97597
	rs1860750	T2DM	A	T	0.509674	0.0122	0.0078	0.1189	2.44642
	rs1861410	T2DM	T	C	0.556123	-0.0208	0.0083	0.0125	6.28016
	rs1884897	T2DM	G	A	0.629424	0.0028	0.0074	0.709099	0.14317
	rs1899951	T2DM	T	C	0.123288	-0.1118	0.0109	1.63682e-24	105.204
	rs1928706	T2DM	A	G	0.470408	-0.0074	0.0079	0.3493	0.877423
	rs1934102	T2DM	A	G	0.343629	-0.0233	0.0084	0.00549997	7.69402
	rs1967772	T2DM	A	G	0.281663	-0.0349	0.0088	7.64504e-05	15.7284
	rs1990662	T2DM	C	A	0.191381	0.0138	0.0099	0.1642	1.94307
	rs2035936	T2DM	T	G	0.0536769	0.0308	0.0168	0.0662201	3.36111
	rs2051559	T2DM	C	T	0.130758	0.0375	0.0114	0.00100201	10.8206
	rs2075466	T2DM	C	G	0.267054	0.0147	0.0088	0.0952599	2.79042
	rs213518	T2DM	C	T	0.143749	0.0206	0.0112	0.0670193	3.38297
	rs2153740	T2DM	G	A	0.479971	-0.0259	0.0079	0.001017	10.7484
	rs215634	T2DM	G	A	0.613703	-0.0256	0.008	0.001448	10.24
	rs217672	T2DM	C	A	0.270159	0.0187	0.0088	0.0345502	4.51562
	rs2191348	T2DM	T	G	0.546935	0.0652	0.0073	3.44429e-19	79.7718
	rs2192158	T2DM	G	A	0.550272	-0.0009	0.0078	0.9086	0.0133136
	rs2193101	T2DM	G	C	0.817981	-0.0242	0.0104	0.02034	5.41457
	rs2216931	T2DM	A	C	0.663907	0.0355	0.0083	2.09098e-05	18.2937
	rs2234458	T2DM	T	C	0.640072	0.0008	0.0082	0.9212	0.00951814
	rs2237892	T2DM	T	C	0.0624896	-0.096	0.0157	8.74601e-10	37.3889
	rs2246618	T2DM	T	C	0.307253	0.0513	0.0084	1.20301e-09	37.2972
	rs2253310	T2DM	G	C	0.62556	0.0122	0.008	0.1284	2.32563
	rs2261181	T2DM	T	C	0.09647	0.0985	0.0118	9.1791e-17	69.68
	rs2271189	T2DM	A	G	0.403913	-0.0212	0.008	0.00815098	7.0225
	rs2275003	T2DM	G	A	0.519753	-0.033	0.0072	4.60002e-06	21.0069
	rs2289379	T2DM	T	C	0.39658	-0.0121	0.008	0.1285	2.28766
	rs2292662	T2DM	T	C	0.151272	-0.0629	0.0111	1.236e-08	32.1111
	rs2294120	T2DM	G	A	0.455879	-0.0443	0.0079	1.61801e-08	31.4451
	rs2296173	T2DM	G	A	0.212011	0.065	0.0087	7.65773e-14	55.8198
	rs2299383	T2DM	T	C	0.423455	0.0412	0.0073	1.49001e-08	31.8529
	rs2307111	T2DM	C	T	0.39727	-0.0407	0.0074	3.02698e-08	30.25
	rs2342892	T2DM	G	T	0.516483	0.0101	0.0078	0.1987	1.67669
	rs2381404	T2DM	C	T	0.241597	0.0241	0.0091	0.00828095	7.01377
	rs2396625	T2DM	A	T	0.422541	-0.002	0.0079	0.803	0.0640923
	rs2398861	T2DM	G	A	0.257167	0.0319	0.0089	0.000365199	12.847
	rs2425816	T2DM	A	G	0.414874	0.0131	0.0079	0.0997999	2.74972
	rs243019	T2DM	C	T	0.455831	0.0566	0.0071	2.28981e-15	63.5501
	rs2433733	T2DM	A	G	0.676713	-0.0171	0.0083	0.0405201	4.24459
	rs2439823	T2DM	G	A	0.547289	0.0102	0.0077	0.1852	1.75476
	rs2482356	T2DM	C	T	0.426505	0.002	0.0079	0.802	0.0640923
	rs2493394	T2DM	G	A	0.107338	0.073	0.0113	1.15101e-10	41.7339
	rs2512892	T2DM	C	T	0.568246	-0.0001	0.0078	0.9939	0.000164366
	rs252761	T2DM	T	G	0.591707	-0.0066	0.0081	0.4175	0.663923
	rs2568958	T2DM	A	G	0.606364	0.0215	0.0074	0.00356402	8.44138
	rs2606228	T2DM	C	A	0.645723	-0.0181	0.0075	0.01617	5.82418
	rs2616143	T2DM	A	G	0.317802	-0.0192	0.0087	0.02844	4.87039
	rs2618039	T2DM	T	A	0.38094	0.038	0.0081	2.35099e-06	22.0088
	rs2678204	T2DM	G	T	0.339373	0.0329	0.0082	6.68698e-05	16.0977
	rs2725371	T2DM	G	A	0.697702	-0.05	0.0085	4.176e-09	34.6021
	rs2781668	T2DM	T	C	0.163301	0.056	0.0105	9.88895e-08	28.4444
	rs2791643	T2DM	T	C	0.762386	0.0167	0.0092	0.0696899	3.29501
	rs2796441	T2DM	A	G	0.416458	-0.0715	0.0073	1.962e-22	95.9326
	rs2820426	T2DM	G	A	0.610058	0.0521	0.0073	1.30197e-12	50.9366
	rs28350	T2DM	G	A	0.820038	-0.0271	0.01	0.00680895	7.3441
	rs2837996	T2DM	C	T	0.648522	0.0176	0.0081	0.0301398	4.72123
	rs28404639	T2DM	T	C	0.364469	0.0037	0.0082	0.6501	0.203599
	rs2861685	T2DM	C	T	0.411584	-0.0152	0.008	0.0557301	3.61
	rs2867125	T2DM	C	T	0.827825	0.0601	0.0096	4.32504e-10	39.1928
	rs2870111	T2DM	T	C	0.411594	-0.0157	0.008	0.0492096	3.85141
	rs2875762	T2DM	C	G	0.241535	0.0265	0.009	0.00324198	8.66975
	rs2899644	T2DM	T	C	0.227425	0.0085	0.0094	0.3656	0.817678
	rs2908282	T2DM	A	G	0.177395	0.0552	0.0094	4.25001e-09	34.4844
	rs2920503	T2DM	T	C	0.284701	0.0215	0.0085	0.0110301	6.39792
	rs2925979	T2DM	C	T	0.70085	-0.0534	0.0078	9.0615e-12	46.8698
	rs2962334	T2DM	T	G	0.0202549	0.0605	0.0272	0.0261102	4.94735
	rs2972144	T2DM	G	A	0.645367	0.0913	0.0075	2.55094e-34	148.19
	rs317656	T2DM	A	T	0.724185	-0.022	0.0087	0.0117301	6.3945
	rs3212038	T2DM	G	A	0.328979	0.0111	0.0083	0.1819	1.7885
	rs32421	T2DM	T	A	0.223374	-0.0078	0.0093	0.4044	0.703434
	rs329118	T2DM	T	C	0.419369	0.031	0.0079	8.50002e-05	15.3982
	rs329651	T2DM	T	G	0.808625	0.0336	0.0097	0.000531998	11.9987
	rs34045288	T2DM	T	C	0.333994	0.0424	0.0083	3.08802e-07	26.0961
	rs340874	T2DM	C	T	0.563904	0.0626	0.0073	8.40621e-18	73.5365
	rs34696181	T2DM	C	T	0.476635	-0.0191	0.0079	0.0149799	5.84538
	rs348330	T2DM	A	G	0.633451	-0.0487	0.0081	1.86402e-09	36.1483
	rs349071	T2DM	A	G	0.500795	-0.0213	0.0079	0.00658597	7.26951
	rs35011184	T2DM	A	G	0.227133	0.2796	0.0088	2.97852e-221	1009.51
	rs35154326	T2DM	G	A	0.272412	-0.0125	0.0089	0.1572	1.9726
	rs355777	T2DM	C	G	0.407728	0.014	0.0079	0.0769804	3.14052
	rs35697587	T2DM	A	G	0.507847	-0.0053	0.0078	0.497	0.461703
	rs35809007	T2DM	A	G	0.362358	-0.0139	0.0082	0.0888894	2.87344
	rs36007635	T2DM	A	G	0.137873	-0.0223	0.0114	0.0500703	3.82649
	rs36061954	T2DM	T	C	0.39664	0.0124	0.008	0.1231	2.4025
	rs3735080	T2DM	T	C	0.230117	0.0207	0.0093	0.0254402	4.95421
	rs3756784	T2DM	G	T	0.185838	0.0505	0.0091	2.58899e-08	30.7964
	rs3764625	T2DM	G	T	0.587998	-0.0089	0.0079	0.2564	1.26919
	rs3784710	T2DM	C	T	0.226862	-0.0204	0.0094	0.0291803	4.70982
	rs3802177	T2DM	A	G	0.311281	-0.1217	0.008	2.32113e-52	231.42
	rs3803286	T2DM	G	A	0.666803	-0.0389	0.0082	2.01902e-06	22.5046
	rs3807566	T2DM	T	G	0.439902	-0.0256	0.0079	0.00119699	10.5009
	rs3814883	T2DM	T	C	0.477936	0.0295	0.0079	0.000181101	13.9441
	rs3851998	T2DM	G	C	0.745124	-0.0132	0.009	0.1419	2.15111
	rs3866805	T2DM	A	C	0.354891	0.0315	0.0082	0.000122301	14.7568
	rs3901286	T2DM	A	C	0.150123	-0.0165	0.0111	0.137	2.20964
	rs3902951	T2DM	G	T	0.237782	0.0258	0.0084	0.002048	9.43367
	rs394608	T2DM	C	T	0.5374	0.0364	0.0079	4.00203e-06	21.2299
	rs396755	T2DM	G	C	0.571813	-0.0191	0.0078	0.0146501	5.99622
	rs40071	T2DM	C	T	0.177736	-0.0131	0.0104	0.2073	1.58663
	rs4017425	T2DM	T	C	0.469921	-0.0208	0.0079	0.008209	6.93222
	rs4055791	T2DM	T	C	0.416534	-0.0282	0.008	0.000392998	12.4256
	rs406388	T2DM	G	C	0.176578	0.0108	0.0103	0.293	1.09944
	rs41315816	T2DM	C	T	0.0585584	0.0202	0.0165	0.2201	1.49877
	rs4148155	T2DM	G	A	0.112482	-0.0056	0.0117	0.631899	0.229089
	rs4261944	T2DM	G	T	0.362338	0.0017	0.0081	0.8382	0.0440482
	rs4284600	T2DM	C	T	0.46716	0.0131	0.0079	0.0998895	2.74972
	rs429343	T2DM	G	A	0.578535	-0.0256	0.0081	0.00160702	9.98872
	rs4307239	T2DM	G	A	0.458768	0.0034	0.008	0.6663	0.180625
	rs4419475	T2DM	T	A	0.406737	0.0301	0.0079	0.0001456	14.5171
	rs4456769	T2DM	T	C	0.333016	0.0061	0.0083	0.4584	0.540136
	rs4477562	T2DM	T	C	0.126251	0.047	0.0117	5.92502e-05	16.137
	rs4482463	T2DM	A	C	0.924155	-0.0362	0.0146	0.0130401	6.14768
	rs4562625	T2DM	G	C	0.614804	-0.0184	0.008	0.0216202	5.29
	rs459193	T2DM	G	A	0.745338	0.0711	0.0083	8.80846e-18	73.3809
	rs4605363	T2DM	C	A	0.341712	0.0277	0.0082	0.000749204	11.4112
	rs4625888	T2DM	T	C	0.557798	0.0053	0.0078	0.4974	0.461703
	rs4648450	T2DM	A	C	0.468452	-0.0065	0.0079	0.4149	0.676975
	rs4658403	T2DM	T	C	0.833744	-0.0194	0.0104	0.06364	3.47966
	rs4672338	T2DM	T	C	0.338129	0.0085	0.0081	0.2903	1.1012
	rs4686471	T2DM	C	T	0.609775	0.0534	0.0081	4.28154e-11	43.4623
	rs4722398	T2DM	T	C	0.135391	0.0358	0.0113	0.00155998	10.0371
	rs4737188	T2DM	T	A	0.47263	-0.0279	0.0078	0.000322003	12.7944
	rs4764949	T2DM	G	A	0.326505	-0.0226	0.0083	0.00630507	7.41414
	rs4810426	T2DM	T	C	0.0967888	0.0726	0.013	2.14798e-08	31.1879
	rs4820410	T2DM	G	A	0.345323	0.0004	0.0083	0.9627	0.00232254
	rs4823182	T2DM	G	A	0.335748	0.0482	0.0077	3.35799e-10	39.1843
	rs4832298	T2DM	T	C	0.686542	-0.0241	0.0084	0.004302	8.23143
	rs4858940	T2DM	C	T	0.887904	0.0289	0.0125	0.0212002	5.34534
	rs4865796	T2DM	A	G	0.69309	0.053	0.0078	1.32892e-11	46.1703
	rs4876611	T2DM	G	A	0.720286	0.0132	0.0088	0.1321	2.25
	rs4929923	T2DM	C	T	0.64287	0.0205	0.0074	0.00540306	7.6744
	rs512121	T2DM	C	T	0.189953	-0.0175	0.0103	0.0902298	2.8867
	rs516946	T2DM	C	T	0.760633	0.0824	0.0085	3.15864e-22	93.9759
	rs5215	T2DM	T	C	0.639941	-0.0678	0.0073	2.08882e-20	86.2608
	rs529200	T2DM	G	A	0.528272	0.0338	0.0079	1.70801e-05	18.3054
	rs539515	T2DM	C	A	0.20451	0.0343	0.0096	0.000336403	12.7657
	rs55726687	T2DM	A	G	0.210258	0.0244	0.0096	0.01088	6.46007
	rs55769038	T2DM	A	G	0.590459	0.0162	0.008	0.0421697	4.10062
	rs557951	T2DM	G	T	0.312766	0.0249	0.0084	0.00305802	8.78699
	rs558887	T2DM	G	A	0.306848	-0.0217	0.0085	0.0110601	6.51751
	rs559231	T2DM	T	G	0.392629	0.0174	0.008	0.0305499	4.73062
	rs56143236	T2DM	T	C	0.256225	0.0036	0.009	0.689	0.16
	rs56161855	T2DM	T	A	0.132882	-0.0225	0.0112	0.0442099	4.03579
	rs56399737	T2DM	T	C	0.44936	-0.0222	0.0079	0.00491598	7.89681
	rs56858768	T2DM	A	G	0.295662	0.0127	0.0086	0.1385	2.18077
	rs56893062	T2DM	G	T	0.303023	-0.0014	0.0085	0.8676	0.027128
	rs57636386	T2DM	C	T	0.0834333	-0.0296	0.0142	0.03748	4.34517
	rs576674	T2DM	A	G	0.832515	-0.0654	0.0097	1.79184e-11	45.4582
	rs59227842	T2DM	G	A	0.309355	0.0334	0.0084	7.377e-05	15.8101
	rs59379014	T2DM	T	C	0.0718905	-0.0497	0.0151	0.001013	10.8333
	rs6023655	T2DM	G	A	0.767416	-0.0057	0.0092	0.533499	0.383861
	rs6059662	T2DM	G	A	0.663176	0.0446	0.0079	1.51199e-08	31.8725
	rs6066138	T2DM	A	G	0.278362	-0.049	0.0082	1.92899e-09	35.7079
	rs60764613	T2DM	T	G	0.14309	0.048	0.0111	1.40101e-05	18.6998
	rs61740466	T2DM	A	G	0.23682	-0.0098	0.0092	0.2893	1.13469
	rs61828641	T2DM	A	G	0.109283	0.0087	0.0124	0.4811	0.492261
	rs61903695	T2DM	G	A	0.254819	0.0173	0.009	0.0540194	3.69494
	rs61953351	T2DM	T	G	0.249902	-0.07	0.0091	1.97606e-14	59.1716
	rs62072006	T2DM	C	A	0.143345	0.0171	0.0112	0.1286	2.33107
	rs62176243	T2DM	T	A	0.246083	-0.0113	0.0092	0.2205	1.50862
	rs62190049	T2DM	C	G	0.389038	-0.0128	0.0081	0.1138	2.49718
	rs622217	T2DM	C	T	0.483932	-0.0485	0.0077	3.12903e-10	39.6736
	rs62241847	T2DM	G	A	0.315069	-0.0239	0.0085	0.00476596	7.90602
	rs62246311	T2DM	A	G	0.102077	0.0175	0.0129	0.1747	1.84033
	rs62379271	T2DM	G	T	0.577492	0.0251	0.008	0.00161801	9.84391
	rs6265	T2DM	T	C	0.189495	-0.0151	0.0092	0.0995703	2.69388
	rs6430068	T2DM	A	G	0.107375	0.0268	0.0125	0.0322797	4.59674
	rs6444950	T2DM	A	G	0.236056	-0.0335	0.0093	0.000307503	12.9755
	rs6474856	T2DM	T	C	0.643729	-0.0155	0.0083	0.0599101	3.48744
	rs6494307	T2DM	G	C	0.426225	-0.0443	0.0078	1.66802e-08	32.2566
	rs6515236	T2DM	C	A	0.24933	-0.0504	0.0091	3.34303e-08	30.6746
	rs6545714	T2DM	A	G	0.602167	-0.0383	0.0074	1.893e-07	26.7876
	rs6560906	T2DM	C	T	0.691379	-0.0254	0.0085	0.00268398	8.92955
	rs6561937	T2DM	A	T	0.754683	-0.0317	0.0091	0.000487304	12.1349
	rs6567160	T2DM	C	T	0.232555	0.0528	0.0084	2.60202e-10	39.5102
	rs6572978	T2DM	T	C	0.569467	0.0068	0.0079	0.3932	0.740907
	rs6575340	T2DM	A	G	0.637885	0.012	0.0082	0.142	2.14158
	rs66679256	T2DM	T	C	0.446008	0.0141	0.0079	0.0740202	3.18555
	rs6669189	T2DM	T	C	0.402515	0.0055	0.0073	0.4501	0.567649
	rs6669341	T2DM	G	A	0.583423	-0.0171	0.0079	0.0312299	4.68531
	rs6682438	T2DM	C	T	0.671554	0.0007	0.0083	0.9339	0.00711279
	rs6696828	T2DM	C	G	0.300501	0.0195	0.0087	0.0244799	5.02378
	rs6705567	T2DM	C	T	0.374887	-0.0044	0.0081	0.5862	0.295077
	rs6707827	T2DM	G	A	0.706147	0.0145	0.0087	0.0941196	2.77778
	rs6710091	T2DM	G	C	0.348364	-0.0137	0.0086	0.1133	2.53772
	rs6713781	T2DM	C	G	0.401734	-0.0206	0.0081	0.0105599	6.46792
	rs67232546	T2DM	T	C	0.209222	0.0596	0.0096	4.66101e-10	38.5434
	rs6725931	T2DM	T	C	0.849604	0.031	0.0111	0.00512401	7.79969
	rs6744646	T2DM	G	A	0.828573	0.0558	0.0105	1.12101e-07	28.2416
	rs6752979	T2DM	A	G	0.317015	0.0128	0.0083	0.1231	2.37828
	rs6774894	T2DM	A	T	0.358188	0.0241	0.0082	0.00316097	8.63786
	rs6795735	T2DM	T	C	0.410912	-0.0558	0.0073	1.63005e-14	58.4282
	rs6831088	T2DM	A	G	0.640669	-0.0118	0.0082	0.1485	2.07079
	rs6843852	T2DM	T	C	0.509441	0.0192	0.0078	0.0141198	6.05917
	rs6878122	T2DM	A	G	0.681791	-0.0564	0.0079	1.18796e-12	50.9688
	rs6909685	T2DM	T	C	0.325704	-0.0268	0.0084	0.00142801	10.1791
	rs6922607	T2DM	G	A	0.190754	0.0006	0.0099	0.9531	0.00367309
	rs6938973	T2DM	C	T	0.600432	0.0223	0.008	0.00549098	7.77016
	rs6962980	T2DM	C	A	0.557124	-0.0175	0.0079	0.0265497	4.90707
	rs698147	T2DM	G	A	0.541565	-0.0122	0.0079	0.1225	2.38487
	rs6998660	T2DM	G	A	0.451581	0.0165	0.0079	0.0373904	4.36228
	rs7024334	T2DM	G	T	0.778434	-0.0128	0.0087	0.1415	2.16462
	rs7034554	T2DM	G	A	0.373291	-0.0255	0.0081	0.00169801	9.91084
	rs7038943	T2DM	C	T	0.341289	-0.0227	0.0082	0.00571597	7.66344
	rs704061	T2DM	C	T	0.454816	0.018	0.0079	0.0216401	5.19148
	rs705145	T2DM	A	C	0.346446	0.0153	0.0081	0.0603407	3.5679
	rs7070670	T2DM	T	C	0.326058	-0.0078	0.0085	0.3557	0.842076
	rs7081254	T2DM	C	T	0.204493	-0.0004	0.0096	0.9665	0.00173611
	rs7124681	T2DM	A	C	0.410079	0.0369	0.0073	3.99503e-07	25.5509
	rs7132908	T2DM	A	G	0.385075	0.0369	0.008	4.27898e-06	21.2752
	rs7138300	T2DM	T	C	0.556835	-0.0443	0.0072	5.64898e-10	37.8567
	rs7144011	T2DM	T	G	0.221063	0.0482	0.0085	1.63599e-08	32.1556
	rs7177055	T2DM	A	G	0.718289	0.0647	0.0079	2.746e-16	67.074
	rs7185735	T2DM	G	A	0.397306	0.1056	0.0073	1.59001e-47	209.258
	rs7206608	T2DM	G	C	0.319777	0.0222	0.0083	0.00750395	7.15401
	rs7218014	T2DM	C	T	0.197278	0.043	0.0097	1.04201e-05	19.6514
	rs7232171	T2DM	T	G	0.582763	0.0121	0.0079	0.1244	2.34594
	rs723672	T2DM	T	C	0.430197	0.0167	0.0079	0.03571	4.46867
	rs7240767	T2DM	C	T	0.383677	0.0451	0.0081	2.157e-08	31.0015
	rs72649373	T2DM	C	T	0.137446	0.0213	0.0114	0.0610604	3.491
	rs72673947	T2DM	G	A	0.104791	0.0258	0.0128	0.0430903	4.06274
	rs72892910	T2DM	T	G	0.172394	0.0648	0.0099	6.42836e-11	42.843
	rs73026725	T2DM	A	C	0.152055	-0.0391	0.011	0.0003874	12.6348
	rs73052033	T2DM	C	T	0.183797	-0.0336	0.0101	0.000829392	11.0672
	rs7306534	T2DM	A	G	0.623442	-0.0061	0.0081	0.450199	0.567139
	rs73124396	T2DM	C	T	0.204928	-0.0181	0.0097	0.0622401	3.48188
	rs73142879	T2DM	T	C	0.191057	-0.0308	0.01	0.002142	9.4864
	rs73193736	T2DM	G	A	0.24184	-0.0198	0.0093	0.0325402	4.53278
	rs73213484	T2DM	T	A	0.141052	-0.0106	0.0113	0.3506	0.879944
	rs7331420	T2DM	A	G	0.284986	-0.0131	0.0087	0.1315	2.26727
	rs7357754	T2DM	G	A	0.500266	0.0083	0.0078	0.2873	1.13231
	rs735949	T2DM	C	T	0.14115	-0.0711	0.0106	1.94581e-11	44.9912
	rs73601548	T2DM	T	C	0.114215	0.0087	0.0122	0.474	0.508533
	rs73985439	T2DM	C	A	0.305693	0.0255	0.0085	0.00275201	9
	rs7442885	T2DM	G	C	0.213524	-0.0251	0.0096	0.0088249	6.83605
	rs745249	T2DM	T	C	0.281221	0.0237	0.0087	0.00625605	7.42093
	rs74750282	T2DM	C	T	0.085696	-0.005	0.014	0.7224	0.127551
	rs7498665	T2DM	G	A	0.395895	0.0173	0.007	0.0129999	6.10796
	rs7516554	T2DM	T	C	0.399371	0.0005	0.0079	0.9542	0.00400577
	rs7519259	T2DM	A	G	0.529359	0.0183	0.0079	0.0206001	5.36597
	rs753270	T2DM	C	T	0.583535	0.0528	0.0079	2.70209e-11	44.6698
	rs754635	T2DM	G	C	0.886831	0.0269	0.0124	0.0302503	4.7061
	rs7561798	T2DM	G	A	0.482171	0.04	0.0072	2.79402e-08	30.8642
	rs7568228	T2DM	C	G	0.526642	-0.026	0.0078	0.000926808	11.1111
	rs7571496	T2DM	G	A	0.259667	-0.0203	0.009	0.0234002	5.08753
	rs7572970	T2DM	G	A	0.722047	0.059	0.0087	1.39091e-11	45.9902
	rs76183894	T2DM	C	T	0.0795891	-0.0261	0.0145	0.0726206	3.24
	rs7619041	T2DM	A	T	0.512919	-0.0431	0.0078	2.756e-08	30.5327
	rs7619139	T2DM	A	T	0.589686	0.0175	0.008	0.0286497	4.78516
	rs76267866	T2DM	T	A	0.206143	0.03	0.0096	0.00184001	9.76562
	rs7651090	T2DM	G	A	0.313377	0.1204	0.0076	3.8539e-57	250.972
	rs765874	T2DM	A	T	0.488318	-0.0157	0.0078	0.0447301	4.05145
	rs76702514	T2DM	G	C	0.208535	-0.0172	0.0097	0.0765808	3.14422
	rs7674212	T2DM	T	G	0.408864	-0.0465	0.0075	6.18201e-10	38.44
	rs7683836	T2DM	A	G	0.554986	-0.0104	0.0079	0.1871	1.73306
	rs7685296	T2DM	T	C	0.279365	-0.0511	0.0081	2.31702e-10	39.799
	rs7704382	T2DM	G	C	0.43304	0.0265	0.0079	0.000841996	11.2522
	rs7708584	T2DM	G	A	0.572666	-0.0179	0.008	0.0243602	5.00641
	rs77258096	T2DM	A	C	0.101383	-0.1171	0.0134	1.7832e-18	76.3667
	rs7729395	T2DM	T	C	0.0509409	0.1373	0.016	1.10103e-17	73.6379
	rs7756992	T2DM	G	A	0.266896	0.1297	0.0078	5.99929e-62	276.497
	rs7761673	T2DM	A	T	0.217669	-0.0282	0.0093	0.00250998	9.19459
	rs7762794	T2DM	G	A	0.285368	0.0312	0.0086	0.000282098	13.1617
	rs7776021	T2DM	A	G	0.287264	0.0108	0.0086	0.2129	1.57707
	rs7786095	T2DM	G	A	0.10386	-0.0743	0.0129	9.64295e-09	33.174
	rs780094	T2DM	C	T	0.612845	0.0692	0.0074	5.15941e-21	87.4478
	rs78012460	T2DM	G	A	0.0222655	-0.0368	0.0267	0.1678	1.89965
	rs7802342	T2DM	G	T	0.289325	0.0126	0.0086	0.1434	2.14657
	rs7805441	T2DM	T	C	0.50417	0.0178	0.0079	0.0241602	5.07675
	rs784257	T2DM	C	T	0.81556	0.0054	0.0101	0.589	0.285854
	rs7845219	T2DM	C	T	0.492786	-0.0422	0.0072	4.54496e-09	34.3526
	rs7893571	T2DM	T	G	0.667177	0.0228	0.0084	0.00633301	7.36735
	rs7923866	T2DM	T	C	0.378775	-0.0972	0.0074	9.33684e-40	172.532
	rs7924036	T2DM	T	G	0.50402	-0.0209	0.0078	0.00786394	7.17965
	rs7925100	T2DM	A	G	0.394995	0.0136	0.008	0.0898297	2.89
	rs7929543	T2DM	C	A	0.0831599	0.0828	0.0138	2.19902e-09	36
	rs7942037	T2DM	C	G	0.358756	-0.0311	0.0082	0.000147901	14.3844
	rs7944782	T2DM	G	T	0.510959	0.0197	0.0078	0.0121199	6.37886
	rs7947143	T2DM	A	G	0.157448	0.0061	0.0109	0.5758	0.313189
	rs7975187	T2DM	G	A	0.211423	0.0336	0.0095	0.000425402	12.5093
	rs79780963	T2DM	T	C	0.103327	0.0057	0.0119	0.6341	0.229433
	rs7979473	T2DM	G	A	0.613626	-0.0304	0.008	0.000151999	14.44
	rs7996639	T2DM	A	G	0.448415	0.0168	0.008	0.03457	4.41
	rs80135274	T2DM	T	A	0.0703216	0.0221	0.0141	0.1164	2.45667
	rs8015400	T2DM	A	C	0.677367	0.0328	0.0083	7.86593e-05	15.6168
	rs8020365	T2DM	A	T	0.219926	0.0465	0.0094	7.44595e-07	24.4709
	rs8022405	T2DM	C	T	0.447999	-0.0069	0.008	0.3862	0.743906
	rs8024137	T2DM	T	A	0.851567	0.0387	0.0111	0.0004797	12.1556
	rs8025516	T2DM	G	T	0.64286	-0.0247	0.0081	0.00241201	9.29873
	rs8047587	T2DM	T	G	0.43976	0.0968	0.0079	2.80414e-34	150.14
	rs8068804	T2DM	A	G	0.325097	0.0587	0.0078	4.41062e-14	56.6353
	rs8076669	T2DM	C	T	0.561807	0.0068	0.0079	0.3926	0.740907
	rs8089514	T2DM	A	T	0.364147	0.0293	0.0081	0.000310299	13.0847
	rs8108269	T2DM	G	T	0.281015	0.0644	0.0079	3.11387e-16	66.4535
	rs812936	T2DM	A	G	0.81969	-0.0206	0.0101	0.0415796	4.15998
	rs815163	T2DM	C	T	0.564685	-0.0113	0.0079	0.1518	2.04599
	rs825476	T2DM	T	C	0.580549	0.0524	0.0073	6.80456e-13	51.5249
	rs840967	T2DM	A	C	0.605922	-0.0497	0.008	5.44202e-10	38.5952
	rs849135	T2DM	A	G	0.499052	-0.0999	0.0072	1.04112e-43	192.516
	rs853974	T2DM	C	T	0.737586	-0.0601	0.0088	7.85778e-12	46.6427
	rs862320	T2DM	T	C	0.411074	-0.0438	0.008	4.85702e-08	29.9756
	rs909892	T2DM	A	G	0.132643	-0.0214	0.0116	0.0652905	3.40339
	rs923994	T2DM	G	A	0.784224	-0.0108	0.0095	0.2575	1.29241
	rs9291822	T2DM	T	C	0.515458	-0.0113	0.0079	0.152	2.04599
	rs9294260	T2DM	A	G	0.47505	0.0181	0.0076	0.0179102	5.67192
	rs9349235	T2DM	T	C	0.411532	0.0032	0.0079	0.6832	0.164076
	rs935166	T2DM	A	G	0.508183	-0.0185	0.0078	0.0185802	5.62541
	rs9366863	T2DM	C	T	0.672067	0.0052	0.0083	0.5312	0.39251
	rs9369425	T2DM	A	G	0.708185	-0.0546	0.0085	1.12899e-10	41.2617
	rs9388446	T2DM	A	T	0.513019	0.0116	0.0078	0.14	2.2117
	rs9461887	T2DM	T	C	0.275226	0.0123	0.0088	0.1595	1.95364
	rs9463175	T2DM	T	C	0.34211	-0.0021	0.0078	0.7872	0.0724852
	rs9478496	T2DM	C	T	0.164498	0.0233	0.0105	0.02629	4.92417
	rs9515446	T2DM	G	A	0.446422	0.0238	0.0078	0.00229599	9.31032
	rs9522180	T2DM	T	C	0.554932	-0.0196	0.0083	0.0184901	5.57643
	rs9571687	T2DM	A	C	0.328805	-0.0173	0.0084	0.0388499	4.24164
	rs961498	T2DM	C	G	0.503702	0.0187	0.0079	0.0181401	5.60311
	rs963740	T2DM	T	A	0.294299	-0.0479	0.0086	2.23198e-08	31.0223
	rs9673839	T2DM	G	A	0.490613	0.0184	0.0079	0.0191298	5.42477
	rs982077	T2DM	G	A	0.565521	-0.0453	0.0072	2.57697e-10	39.5851
	rs9830592	T2DM	A	C	0.583195	0.0108	0.0079	0.1723	1.86893
	rs9843653	T2DM	C	T	0.511158	0.0342	0.008	1.74799e-05	18.2756
	rs9844972	T2DM	C	G	0.0697229	0.0956	0.0148	1.02601e-10	41.7246
	rs9876664	T2DM	T	G	0.375075	-0.0206	0.0081	0.0109901	6.46792
	rs9894220	T2DM	G	A	0.43374	-0.0585	0.0079	1.51705e-13	54.835
	rs9926784	T2DM	C	T	0.18375	-0.0225	0.0093	0.01503	5.85328
	rs9931586	T2DM	G	C	0.268506	-0.003	0.0089	0.7362	0.113622
	rs993380	T2DM	G	A	0.66555	-0.0507	0.0081	4.58701e-10	39.1783
	rs9940149	T2DM	A	G	0.178556	-0.058	0.0095	9.29095e-10	37.2742
	rs9951619	T2DM	G	T	0.769605	0.0398	0.0084	2.1e-06	22.4495
