# Supplementary material
Source: Research Square preprint supplement (doi:10.21203/rs.3.rs-9116792/v1)
Supplement: Supplementary file 4 [file 98c007d326f1d5631c4e3df4.xlsx]

## Sheet: Table1
	Table 1 Main MR results of galectin-3, BMI, T2DM and periodontitis
	Analysis	Exposure	Method	NSNP	OR(CI)	P Value
	Univariable MR	Galectin-3 (Raw)	IVW	8	1.031 (1.003-1.059)	0.0295
	Multivariable MR	BMI (Adjusted)	MVMR-IVW	303	1.075 (1.027-1.126)	0.00209
	Multivariable MR	Galectin-3 (Adjusted)	MVMR-IVW	6	1.017 (0.986-1.049)	0.277
	Multivariable MR	T2DM (Adjusted)	MVMR-IVW	117	1.013 (0.994-1.032)	0.184
	Abbreviations: UVMR, univariable MR; MVMR, multivariable MR; OR, odds ratio; CI, confidence interval. MVMR adjusted for galectin-3, BMI, T2DM
