# Supplementary material
Source: Research Square preprint supplement (doi:10.21203/rs.3.rs-9116792/v1)
Supplement: Supplementary file 5 [file f7cb74f87166128ce510ab53.xlsx]

## Sheet: Supp Table 1
	Supplementary Table 1 Data sources and summary statistics
	Variable Role	Phenotype	Data Source	Ancestry	Total Sample Size	No.of Cases	No.of controls	GWAS ID / Code
	Exposure1	Body Mass Index	UK Biobank	European	461460	N/A (Continuous)	N/A	ukb-b-19953
	Exposure2	Galectin-3	SCALLOP	European	21758	N/A (Continuous)	N/A	ebi-a-GCST90012009
	Exposure3	Type 2 Diabetes Mellitus	DIAGRAM	European	655666	61714	593952	ebi-a-GCST006867
	Outcome	Periodontitis	FinnGen (Release 11)	European	415498	24570	390928	K11_GINGIVITIS_PERIODONTAL
	Abbreviations: GWAS, genome-wide association study; BMI, body mass index; T2DM, type 2 diabetes mellitus. All data were derived from European ancestry populations
